# Supplementary material for: Associations between social capital and maternal depression: results from a follow-up study in China
Source: BMC Pregnancy Childbirth. 2018 Feb 2;18:45. doi: 10.1186/s12884-018-1673-9 (PMC5797398; doi:10.1186/s12884-018-1673-9)
Supplement: Additional file 1: — Survey data: Data of Social capital and depressive symptoms scores were collected among Chinese primiparas at different time-points from their late pregnancy to postpartum. (XLSX 195 kb) [file 12884_2018_1673_MOESM1_ESM.xlsx]

## Sheet: 工作表1
time	age	agecat	district	education	character	planned_pregnancy	incoming_per_month	delivery_by_cesarean_section	relationship_with_husband	relationship_with_parents_in_law	sleep	EPDS_1	EPDS_2	EPDS_3	EPDS_4	EPDS_5	EPDS_6	EPDS_7	EPDS_8	EPDS_9	EPDS_10	depression_score	depressioncat	ST_1	ST_2	ST_3	ST_4	ST_5	ST_6	ST_7	ST_8	ST_score	SR_1	SR_2	SR_3	SR_4	SR_5	SR_6	SR_7	SR_score	upper_reach_ability	network_range	network_diversity	SN_score	Z_SN_score	SP_1	SP_2	SP_3	SP_4
1	34	2	2	5	2	1	4					3	3	3	2	2	2	1	2	2	1	9	1	4	4	4	4	4	4	5	4	33	4	4	4	26	0	4	3	4	95	18	5	118	1.97	5	5	4	5
1	26	1	1	3	1	2	4					2	2	4	4	4	4	2	1	2	1	18	1	4	5	5	5	5	4	5	5	38	4	4	4	27	0	4	4	4	86	38	4	128	1.59	6	6	4	4
1	30	2	2	4	2	1	3					3	3	2	2	2	2	2	2	2	1	9	1	4	4	4	3	4	3	4	3	29	4	4	4	28	0	4	4	4	64	63	3	130	0.76	4	4	4	4
1	28	1	1	5	2	1	4					3	3	3	2	2	2	2	2	2	2	11	1	4	4	4	3	4	4	4	4	31	3	4	4	26	0	4	4	4	95	31	4	130	1.79	5	5	5	5
1	24	1	1	3	2	1	2					3	3	2	3	3	2	2	2	2	1	11	1	3	3	3	3	3	3	3	3	24	2	3	3	22	0	4	4	4	86	61	5	152	2.98	4	4	4	4
1	34	2	1	4	1	1	4					2	3	2	2	2	2	3	3	2	2	13	1	2	3	4	3	3	3	5	4	27	3	3	3	20	0	3	4	2	86	71	2	159	1.46	4	4	4	1
1	28	1	2	2	2	2	3					3	2	3	3	2	2	2	2	2	2	13	1	3	3	3	2	3	3	3	3	23	3	3	3	20	0	3	3	3	86	34	6	126	2.7	4	4	4	3
1	35	2	1	4	2	1	4					3	2	2	2	2	2	3	2	2	1	11	1	4	4	4	4	4	3	5	5	33	4	4	4	30	0	5	5	4	77	0	1	78	-1.96	4	4	4	3
1	26	1	1	4	2	1	3					1	1	2	1	1	2	2	1	2	1	10	1	4	5	4	5	5	5	5	5	38	4	4	4	26	0	3	4	3	77	0	1	78	-1.96	6	5	3	3
1	33	2	1	4	1	1	3					3	3	2	2	2	2	3	2	1	1	9	1	4	4	4	4	4	4	4	4	32	4	4	4	28	0	4	4	4	71	0	1	72	-2.25	4	4	4	4
1	33	2	1	5	2	1	4					2	3	2	2	2	1	4	2	2	1	11	1	3	4	3	3	5	3	5	4	30	4	5	5	30	0	4	4	4	15	0	1	16	-4.93	5	3	3	2
1	23	1	2	2	1	1	3					2	3	2	3	2	2	2	1	1	1	9	1	3	4	4	4	4	4	3	4	30	4	4	3	27	0	4	4	4	64	0	1	65	-2.59	5	4	2	2
1	29	1	1	3	1	1	2					2	3	2	3	1	1	3	2	3	1	11	1	4	4	1	3	4	4	4	3	27	4	4	4	25	0	4	4	3	1	0	1	2	-5.6	3	4	3	4
1	26	1	2	3	2	2	3					3	3	3	2	2	2	2	2	2	1	10	1	3	4	4	4	4	4	4	3	30	4	4	3	24	0	3	4	3	71	19	2	92	-1	5	5	4	3
1	25	1	2	4	2	1	3					1	1	2	2	1	2	2	1	2	1	11	1	4	4	4	3	4	3	4	3	29	4	4	4	26	0	4	4	3	52	37	2	91	-1.3	5	4	4	3
1	33	2	1	5	1	1	4					2	2	2	2	2	2	2	2	2	2	12	1	3	4	4	4	4	4	4	4	31	4	4	4	28	0	4	4	4	91	5	2	98	-0.51	4	5	5	5
1	30	2	1	4	2	1	4					1	1	2	2	2	2	3	1	2	1	13	1	3	4	4	4	4	4	4	4	31	2	4	2	22	0	4	4	4	80	0	1	81	-1.82	5	5	5	1
1	28	1	2	2	1	1	3					1	1	2	2	2	1	2	2	2	1	12	1	3	4	2	2	1	1	1	1	15	2	4	2	13	0	1	1	1	64	0	1	65	-2.59	3	2	2	1
1	34	2	1	4	2	1	4					2	3	3	2	2	1	2	2	2	1	10	1	3	4	5	4	4	3	4	3	30	3	4	4	19	0	2	3	2	91	5	2	98	-0.51	4	4	2	1
1	32	2	1	4	2	1	2					2	2	2	2	2	2	2	1	1	1	9	1	3	4	4	4	4	4	4	4	31	3	3	3	20	0	4	3	2	77	13	2	92	-0.91	5	3	3	3
1	27	1	1	4	2	1	4					2	2	2	3	3	2	2	3	2	2	15	1	3	3	3	3	3	2	2	3	22	3	3	3	21	0	3	3	3	58	43	3	104	-0.2	4	5	4	3
1	28	1	2	3	2	2	4					2	3	3	2	3	1	2	2	2	1	11	1	5	4	5	4	4	4	5	3	34	5	4	4	25	0	3	3	3	91	38	5	134	2.45	4	4	3	4
1	27	1	1	4	2	1	3					2	3	2	2	2	1	1	2	2	2	9	1	4	4	4	3	4	5	4	4	32	3	4	3	21	0	3	3	3	77	25	3	105	0.11	4	4	2	3
1	30	2	1	4	2	1	4					3	3	2	2	2	1	2	2	2	2	9	1	4	4	5	4	4	4	4	4	33	3	3	4	18	0	2	2	2	86	71	5	162	3.32	5	4	3	2
1	28	1	1	4	2	1	4					2	2	2	2	2	1	2	2	2	1	10	1	3	4	3	3	3	4	3	2	25	3	4	4	16	0	2	1	1	86	28	3	117	0.64	4	3	1	1
1	28	1	1	4	1	1	4					2	2	2	2	2	2	2	2	2	1	11	1	3	3	3	4	4	3	4	3	27	3	4	3	21	0	2	3	3	86	38	3	127	0.98	4	3	2	1
1	30	2	2	5	2	1	4					3	3	2	2	2	2	2	2	2	1	9	1	3	3	3	3	3	3	3	3	24	3	3	3	21	0	3	3	3	95	9	3	107	0.44	5	4	2	4
1	31	2	2	4	2	2	4					3	3	2	2	2	2	2	2	2	1	9	1	3	3	3	3	3	3	4	3	25	3	3	4	22	0	3	3	3	71	70	3	144	1.33	4	4	4	4
1	35	2	2	2	2	1	3					4	3	4	3	2	1	2	1	2	1	9	1	3	3	1	4	1	3	4	3	22	2	3	1	18	0	3	3	2	64	63	3	130	0.76	4	2	3	3
1	26	1	1	4	1	2	3					2	3	2	1	1	1	3	2	2	2	9	1	4	3	4	3	4	3	4	3	28	4	4	3	19	0	2	2	2	77	52	2	131	0.4	3	3	1	1
1	32	2	2	4	1	1	3					2	3	2	3	1	1	3	1	2	1	9	1	3	4	4	3	3	4	3	2	26	2	3	3	17	0	2	2	2	77	25	3	105	0.11	5	3	2	1
1	29	1	2	1	1	1	2					1	1	2	2	2	2	1	1	1	1	10	1	3	3	4	3	3	3	4	3	26	1	3	4	14	0	1	1	3	95	71	6	172	4.37	4	4	4	1
1	26	1	2	3	1	1	3					2	3	2	2	2	2	2	2	2	1	10	1	3	3	3	4	5	5	4	3	30	4	3	3	20	0	2	3	3	64	63	4	131	1.38	6	4	2	2
1	24	1	2	4	2	2	1					3	3	2	2	2	2	2	2	2	1	9	1	3	3	2	4	4	4	4	4	28	2	3	3	20	0	3	3	3	91	90	3	184	2.96	5	4	3	4
1	29	1	2	5	2	1	4					2	3	2	2	2	1	2	2	2	1	9	1	4	4	4	4	4	4	4	3	31	4	4	3	22	0	3	3	3	86	85	3	174	2.55	4	4	4	4
1	27	1	1	5	1	2	4					2	2	3	4	4	3	4	3	3	2	22	1	2	3	3	4	2	3	5	3	25	4	4	4	22	0	3	3	2	86	85	4	175	3.17	4	3	1	1
1	28	1	2	4	1	1	4					2	2	2	2	2	2	2	2	2	1	11	1	4	4	4	4	4	4	4	3	31	3	4	3	18	0	1	3	2	86	71	2	159	1.46	3	2	1	1
1	30	2	2	5	1	1	4					3	2	3	3	2	2	2	2	2	1	12	1	3	3	4	4	4	4	4	3	29	3	3	4	20	0	2	2	3	77	76	3	156	1.82	4	4	3	3
1	29	1	1	4	2	1	3					2	3	3	2	1	2	3	1	1	1	9	1	4	3	2	3	2	4	4	3	25	3	4	4	21	0	4	2	2	86	34	2	122	0.22	3	1	1	1
1	26	1	2	3	2	1	4					3	3	2	2	2	1	3	2	2	1	9	1	4	5	5	4	5	5	5	5	38	4	5	3	29	0	4	5	5	58	0	1	59	-2.87	5	2	1	1
1	27	1	2	3	2	1	3					3	3	2	2	2	2	2	2	2	1	9	1	4	4	4	4	4	4	5	5	34	3	4	4	26	0	4	4	4	71	0	1	72	-2.25	4	4	4	4
1	25	1	2	4	2	2	4					3	3	3	2	2	1	2	2	2	1	9	1	4	5	4	4	4	4	4	4	33	4	4	4	26	0	4	4	3	1	0	1	2	-5.6	3	3	3	3
1	32	2	1	4	1	1	1					2	3	2	2	2	1	2	2	2	1	9	1	4	4	4	4	4	4	4	3	31	4	4	4	26	0	4	4	3	86	0	1	87	-1.53	4	4	3	2
1	26	1	2	2	1	1	4					2	3	3	3	2	1	3	2	3	2	14	1	3	4	4	2	2	3	3	4	25	3	4	4	26	0	3	4	4	52	0	1	53	-3.16	3	3	3	1
1	29	1	1	4	2	1	3					3	3	2	2	2	2	2	2	2	1	9	1	3	4	4	4	4	4	4	4	31	4	4	4	28	0	4	4	4	58	33	3	94	-0.53	3	3	3	3
1	26	1	1	4	2	1	3					3	3	3	2	2	1	2	2	2	1	9	1	3	4	4	3	3	3	4	4	28	4	4	3	25	0	4	4	3	64	12	4	80	-0.33	4	3	3	3
1	28	1	2	2	2	1	4					3	3	2	3	2	2	2	1	2	1	9	1	5	4	4	4	4	4	4	4	33	3	3	4	22	0	4	4	3	71	13	2	86	-1.2	5	2	1	1
1	26	1	2	3	1	1	4					2	3	3	1	1	2	3	2	2	1	10	1	3	4	3	5	5	4	5	3	32	3	3	3	18	0	3	3	2	71	0	1	72	-2.25	4	3	3	1
1	26	1	1	4	2	1	4					2	3	3	4	3	2	4	3	4	1	19	1	3	4	4	5	4	5	5	3	33	4	4	4	22	0	3	3	2	77	19	3	99	-0.09	4	2	1	1
1	26	1	2	4	1	2	4					3	2	3	3	2	1	2	2	2	1	11	1	4	4	4	4	4	4	4	4	32	3	2	3	18	0	3	3	2	53	38	2	93	-1.22	2	1	1	1
1	26	1	1	5	2	1	4					2	3	2	2	2	1	2	2	2	1	9	1	3	4	4	4	4	4	5	4	32	3	4	4	20	0	3	3	1	91	0	1	92	-1.29	3	3	3	3
1	29	1	2	4	2	1	3					2	2	2	1	2	1	2	1	3	1	9	1	4	4	4	5	4	5	5	4	35	4	4	4	20	0	1	3	2	64	12	2	78	-1.57	5	4	4	1
1	27	1	2	5	1	1	4					2	2	2	2	2	1	2	1	2	1	9	1	3	4	4	4	4	4	4	3	30	3	4	4	23	0	3	3	3	77	0	1	78	-1.96	4	3	3	3
1	30	2	2	4	2	1	3					2	3	3	2	2	1	2	2	2	1	10	1	3	4	4	4	4	3	4	3	29	2	3	4	15	0	2	2	1	15	0	1	16	-4.93	4	6	1	1
1	26	1	2	4	1	2	4					3	3	2	3	2	2	2	2	2	1	10	1	4	4	3	3	3	3	4	4	28	3	3	3	20	0	3	3	3	77	24	2	103	-0.54	4	2	1	2
1	25	1	1	2	1	2	3					3	3	3	2	2	2	3	1	2	1	10	1	5	3	4	1	5	5	4	3	30	2	5	3	22	0	4	3	3	64	49	2	115	-0.33	4	4	1	1
1	28	1	1	4	2	1	3					3	3	2	2	2	2	2	2	2	1	9	1	4	4	3	4	4	3	4	3	29	3	2	3	18	0	3	3	2	15	0	1	16	-4.93	2	2	2	2
1	31	2	1	4	2	1	4					1	1	3	3	2	3	3	2	2	2	18	1	3	3	3	3	3	3	3	3	24	3	3	3	21	0	3	3	3	71	0	1	72	-2.25	4	4	4	4
1	26	1	1	3	1	2	1					2	2	2	2	2	2	2	2	2	1	11	1	3	3	3	3	3	3	4	3	25	3	3	3	21	0	3	3	3	1	0	1	2	-5.6	2	1	1	1
1	27	1	1	3	1	1	2					2	2	2	2	2	1	2	2	2	1	10	1	4	4	4	4	4	4	4	3	31	3	3	4	22	0	3	3	3	53	0	1	54	-3.11	2	1	1	1
1	34	2	1	5	1	1	3					2	2	3	3	3	2	2	2	1	1	13	1	2	3	3	2	4	4	4	2	24	3	3	3	17	0	2	2	2	64	12	3	79	-0.95	3	3	3	3
1	25	1	2	3	2	2	2					2	2	1	2	2	1	2	2	2	1	9	1	2	4	4	4	4	4	3	3	28	3	4	3	22	0	3	3	3	1	0	1	2	-5.6	2	2	2	1
1	33	2	1	4	2	1	3					1	1	4	4	4	4	4	4	4	4	30	1	4	4	3	2	2	2	4	3	24	3	3	2	18	0	2	2	3	64	0	1	65	-2.59	1	1	1	1
1	30	2	1	4	2	1	4					3	3	2	3	3	2	3	2	2	1	12	1	4	4	4	4	4	4	4	3	31	4	3	4	21	0	3	3	2	15	0	1	16	-4.93	4	4	4	4
1	33	2	1	4	1	1	4					1	1	2	2	1	1	2	1	2	1	10	1	2	4	3	4	4	5	4	3	29	3	4	4	21	0	3	3	2	86	0	1	87	-1.53	4	3	2	1
1	28	1	2	4	1	1	3					2	3	2	2	2	2	3	2	2	1	11	1	3	3	4	3	2	3	4	3	25	3	2	4	18	0	2	3	2	71	19	3	93	-0.38	4	3	3	3
1	27	1	2	3	1	1	3					3	3	2	2	2	2	2	2	2	1	9	1	4	3	5	3	3	3	4	3	28	3	3	2	19	0	3	3	3	86	0	1	87	-1.53	2	2	1	1
1	28	1	2	3	1	1	4					2	3	2	2	2	2	2	2	2	1	10	1	3	3	3	2	3	2	4	3	23	4	3	3	21	0	2	3	3	64	0	1	65	-2.59	3	4	3	1
1	30	2	1	5	1	1	4					2	3	2	2	2	2	2	2	2	2	11	1	2	3	3	3	4	4	4	3	26	3	3	3	19	0	3	3	2	86	0	1	87	-1.53	5	3	2	2
1	26	1	1	4	1	1	4					3	2	2	3	2	1	2	1	2	1	9	1	3	4	3	3	3	3	3	3	25	3	3	3	20	0	3	3	2	58	43	2	103	-0.82	5	3	3	2
1	26	1	2	2	1	2	3					2	3	2	2	2	2	2	2	2	2	11	1	3	3	3	3	3	3	3	3	24	3	3	3	21	0	3	3	3	71	19	2	92	-1	4	4	4	4
1	28	1	1	3	2	1	4					4	4	1	3	3	2	4	3	3	1	12	1	2	3	3	3	3	3	3	3	23	3	3	3	21	0	3	3	3	20	0	1	21	-4.69	4	4	4	4
1	26	1	2	4	1	1	3					3	4	2	2	1	1	1	1	2	1	4	2	3	4	4	5	5	4	5	4	34	5	5	5	31	0	4	4	4	86	80	6	172	4.24	5	5	3	3
1	27	1	1	4	2	1	4					4	4	2	2	2	1	1	1	1	1	3	2	4	4	5	5	5	4	5	5	37	3	4	4	26	0	5	4	3	77	25	3	105	0.11	4	4	4	3
1	27	1	2	3	2	1	3					4	3	2	1	1	1	1	1	1	1	2	2	4	4	4	4	4	4	5	4	33	4	4	4	29	0	5	4	4	86	34	2	122	0.22	5	5	4	3
1	28	1	1	4	2	1	4					2	3	1	1	1	1	1	1	2	1	4	2	4	4	4	4	4	4	4	4	32	4	4	3	24	0	4	4	3	95	18	2	115	0.12	4	3	3	4
1	25	1	1	4	2	1	4					4	4	2	1	1	1	2	1	1	1	2	2	4	4	4	4	5	4	4	5	34	5	5	5	35	0	5	5	5	86	22	3	111	0.44	4	5	5	4
1	30	2	1	5	1	1	4					3	3	2	1	1	1	1	1	2	1	4	2	4	4	4	5	5	5	5	4	36	4	4	4	27	0	4	4	4	80	69	5	154	2.96	5	6	4	3
1	18	1	2	2	2	2	4					4	4	2	1	1	1	2	1	4	1	5	2	5	5	5	4	5	5	5	3	37	4	5	5	34	0	5	5	5	71	70	2	143	0.71	6	6	5	6
1	24	1	2	4	1	1	3					4	4	1	2	1	2	2	1	1	1	3	2	5	5	5	3	3	3	4	5	33	5	5	3	31	0	5	5	4	71	70	3	144	1.33	6	6	6	1
1	27	1	1	4	2	1	4					3	3	1	2	1	1	2	1	2	1	5	2	4	4	5	4	4	4	5	4	34	5	5	3	26	0	4	5	2	86	75	7	168	4.69	5	4	3	3
1	38	2	1	4	2	1	4					3	3	2	2	2	2	2	1	1	1	7	2	5	5	5	5	5	5	5	5	40	4	5	4	24	0	3	4	2	86	34	2	122	0.22	3	3	3	3
1	29	1	2	2	2	1	2					3	4	2	2	1	1	2	1	1	1	4	2	4	4	4	4	5	5	5	5	36	5	5	5	34	0	5	5	4	91	90	6	187	4.81	5	4	5	3
1	28	1	2	4	2	1	3					3	3	2	2	1	1	1	1	1	1	4	2	2	4	4	4	4	5	5	4	32	4	5	4	29	0	5	5	4	71	70	3	144	1.33	5	5	3	1
1	33	2	2	4	1	1	4					4	4	2	1	1	1	1	1	1	1	1	2	5	5	5	5	5	5	4	5	39	5	5	5	34	0	5	5	5	71	70	5	146	2.57	6	6	6	6
1	29	1	1	4	2	1	4					3	3	2	2	1	1	1	1	2	1	5	2	4	4	4	4	4	4	4	4	32	4	4	4	27	0	4	4	4	77	52	3	132	1.01	5	5	4	3
1	26	1	1	4	2	1	3					4	4	2	1	1	2	1	1	1	1	2	2	3	4	4	5	5	4	5	5	35	1	4	3	24	0	5	5	3	77	62	3	142	1.35	4	5	4	2
1	27	1	1	5	2	1	4					4	4	1	2	1	1	1	1	1	1	1	2	4	5	5	5	5	5	5	5	39	5	5	5	33	0	5	5	4	95	47	4	146	2.33	5	6	6	5
1	28	1	1	3	2	1	4					3	4	1	2	1	1	1	1	1	1	2	2	4	4	5	5	5	4	5	5	37	4	5	5	30	0	5	5	3	80	65	3	148	1.59	5	5	4	4
1	31	2	2	5	1	1	4					3	3	2	1	1	1	1	1	1	1	3	2	5	4	4	4	4	4	4	4	33	4	4	4	28	0	4	4	4	91	67	5	163	3.42	5	4	3	3
1	30	2	2	5	2	1	4					4	4	1	1	1	1	1	1	1	1	0	2	4	5	5	5	5	5	5	5	39	5	5	5	35	0	5	5	5	91	90	4	185	3.58	3	3	3	3
1	28	1	1	4	1	1	3					3	3	2	2	2	2	2	2	1	1	8	2	4	4	4	4	4	4	4	4	32	4	4	4	28	0	4	4	4	91	90	4	185	3.58	4	4	4	5
1	27	1	2	4	2	1	4					4	4	3	1	1	1	1	1	2	1	3	2	4	5	5	5	5	5	5	5	39	5	5	4	30	0	4	4	4	95	71	5	171	3.75	3	4	2	2
1	25	1	2	3	2	1	4					4	4	2	1	2	1	1	1	1	1	2	2	3	4	4	4	4	4	5	4	32	4	5	5	29	0	4	4	5	77	25	3	105	0.11	4	4	4	4
1	28	1	2	4	2	1	4					4	4	1	2	2	1	1	1	1	1	2	2	4	4	4	5	5	5	5	3	35	4	5	4	24	0	3	4	2	86	28	2	116	0.02	3	5	3	3
1	23	1	1	4	2	1	3					3	2	2	2	2	1	1	2	2	1	8	2	5	4	5	3	5	4	5	3	34	4	4	5	28	0	5	4	4	80	28	4	112	0.97	4	4	2	2
1	27	1	2	3	2	1	3					4	4	2	1	1	1	2	1	2	1	3	2	4	4	5	5	5	5	5	4	37	4	4	4	29	0	4	5	4	86	85	5	176	3.79	4	2	4	2
1	31	2	1	4	2	1	4					4	4	2	2	1	1	1	1	2	1	3	2	4	4	5	4	4	4	5	3	33	4	4	4	24	0	4	4	3	86	34	3	123	0.84	6	6	4	4
1	30	2	1	4	2	1	3					3	3	2	2	1	1	1	1	1	1	4	2	4	4	5	5	5	5	5	5	38	4	5	5	32	0	5	5	4	64	58	4	126	1.21	5	5	5	3
1	22	1	1	3	2	1	3					4	4	2	2	1	1	1	1	1	1	2	2	1	1	1	1	1	4	5	5	19	4	4	4	28	0	4	4	4	86	28	5	119	1.88	5	4	4	3
1	34	2	1	3	2	1	4					3	3	2	2	2	2	2	1	2	1	8	2	3	4	4	4	4	4	4	4	31	4	4	4	25	0	3	4	3	86	22	3	111	0.44	4	4	4	3
1	26	1	2	4	1	1	3					3	3	2	1	1	1	1	2	1	1	4	2	3	4	4	4	4	4	4	4	31	4	4	3	27	0	4	4	4	91	39	5	135	2.49	5	4	4	4
1	28	1	1	5	2	1	4					3	4	2	2	1	1	2	1	2	1	5	2	3	4	4	4	4	4	4	4	31	4	4	3	26	0	4	4	4	91	33	4	128	1.67	3	3	3	3
1	25	1	1	4	1	1	3					3	3	2	2	1	1	2	1	2	1	6	2	3	4	4	4	4	4	4	4	31	4	4	4	26	0	3	4	4	80	55	5	140	2.5	4	4	4	4
1	33	2	1	3	2	1	2					4	4	2	2	1	2	2	2	2	1	6	2	3	3	4	3	5	4	5	4	31	3	3	3	25	0	4	4	4	77	25	3	105	0.11	5	5	5	4
1	26	1	1	3	2	2	4					3	3	2	2	2	1	2	2	1	1	7	2	3	4	4	3	4	4	5	4	31	4	4	3	24	0	4	4	2	80	28	3	111	0.35	5	4	3	4
1	30	2	2	5	2	1	4					3	4	2	1	1	1	1	1	1	1	2	2	4	4	4	4	4	4	4	3	31	4	4	4	25	0	4	4	3	95	70	6	171	4.33	4	4	3	3
1	33	2	1	5	1	1	4					3	3	2	2	1	1	1	1	2	1	5	2	4	4	4	4	4	4	4	3	31	4	4	5	27	0	3	4	4	91	39	4	134	1.87	5	4	3	3
1	29	1	2	4	2	1	4					3	3	2	2	1	1	1	1	1	1	4	2	3	3	3	4	4	4	4	4	29	4	4	4	28	0	4	4	4	86	71	5	162	3.32	5	5	5	5
1	32	2	1	5	2	1	4					3	3	2	2	2	1	2	2	2	1	8	2	4	5	4	3	3	3	4	3	29	4	4	4	25	0	4	4	3	91	20	3	114	0.61	5	4	3	3
1	26	1	1	4	2	1	4					3	3	2	2	2	1	2	2	2	1	8	2	3	3	3	3	2	5	4	4	27	5	4	4	30	0	5	4	4	86	71	3	160	2.08	5	6	5	4
1	31	2	1	4	2	1	4					3	3	2	1	1	1	1	1	1	1	3	2	4	4	4	4	4	4	4	3	31	3	4	4	24	0	4	4	3	91	66	6	163	4.01	5	5	4	4
1	28	1	1	4	1	1	4					3	3	1	1	1	1	1	1	1	1	2	2	4	4	3	4	4	5	5	4	33	3	4	3	23	0	4	4	3	86	34	6	126	2.7	5	5	3	3
1	30	2	1	2	1	1	3					2	4	2	3	2	1	2	1	2	1	8	2	5	5	5	5	5	5	4	4	38	1	4	5	22	0	1	3	4	64	53	4	121	1.04	4	3	1	1
1	29	1	1	4	2	1	4					4	4	2	2	1	1	1	1	2	1	3	2	3	4	4	4	4	4	5	4	32	2	4	4	21	0	3	4	2	80	32	3	115	0.49	5	5	4	3
1	27	1	1	4	2	2	3					3	3	2	2	2	1	2	1	2	1	7	2	3	3	3	3	3	5	4	4	28	3	2	3	19	0	3	3	3	80	32	4	116	1.11	5	5	5	2
1	30	2	1	5	2	1	4					4	4	2	1	1	2	2	2	2	1	5	2	4	4	4	4	4	4	4	3	31	3	4	4	22	0	3	3	3	95	24	2	121	0.32	5	4	4	4
1	26	1	1	4	2	1	4					3	4	4	2	2	1	1	1	1	1	6	2	3	5	3	4	5	4	4	3	31	3	4	4	21	0	3	3	2	86	61	6	153	3.6	5	4	3	3
1	30	2	1	5	2	1	4					3	3	2	1	1	1	1	2	2	1	5	2	3	4	4	4	4	4	4	3	30	3	3	4	20	0	4	3	2	86	34	3	123	0.84	5	5	4	3
1	30	2	1	4	1	1	4					3	3	2	2	1	1	2	2	2	1	7	2	4	4	4	4	4	4	4	3	31	3	4	3	23	0	3	3	4	86	33	4	123	1.43	4	3	3	3
1	30	2	2	3	2	1	3					3	3	2	2	2	1	1	2	2	1	7	2	4	4	3	3	4	4	4	4	30	3	4	3	22	0	3	3	3	86	71	3	160	2.08	5	3	3	2
1	29	1	2	4	2	1	4					3	3	1	1	1	2	1	1	3	1	5	2	3	3	3	3	3	4	4	3	26	4	3	4	19	0	2	2	2	77	76	4	157	2.44	4	5	1	2
1	29	1	1	4	2	2	4					4	4	2	1	1	1	2	1	2	1	3	2	2	2	4	4	4	4	4	3	27	4	3	4	21	0	3	3	2	86	62	3	151	1.78	5	5	5	5
1	28	1	2	4	2	1	4					3	3	2	1	1	1	2	1	1	1	4	2	4	3	3	3	3	4	3	3	26	3	3	3	16	0	2	2	2	86	71	2	159	1.46	5	3	3	3
1	30	2	1	4	2	1	3					3	3	2	3	2	1	1	2	2	1	8	2	4	4	4	3	3	2	4	3	27	3	4	4	22	0	3	4	2	91	39	3	133	1.25	3	1	1	1
1	29	1	1	4	1	1	4					3	3	2	2	1	1	1	1	2	1	5	2	3	4	3	4	4	4	4	3	29	3	4	4	22	0	3	3	3	86	34	3	123	0.84	4	5	4	4
1	28	1	1	4	2	1	4					3	3	2	2	2	1	1	1	2	1	6	2	3	4	4	4	4	4	5	3	31	1	3	2	18	0	3	3	4	86	33	4	123	1.43	4	4	3	3
1	28	1	1	4	2	1	3					3	3	2	2	1	1	1	2	2	1	6	2	4	3	4	3	3	4	4	4	29	3	4	4	23	0	3	4	3	95	31	2	128	0.55	5	3	2	1
1	29	1	1	4	2	1	4					1	1	1	1	1	1	1	1	1	1	6	2	1	1	1	1	1	1	1	1	8	1	1	1	7	0	1	1	1	86	34	4	124	1.46	5	6	6	6
1	31	2	1	4	2	1	4					3	3	2	2	2	1	2	2	2	1	8	2	4	3	4	3	3	3	4	3	27	4	3	3	21	0	3	3	3	64	63	3	130	0.76	4	4	4	2
1	25	1	1	3	2	1	4					4	4	2	2	2	1	1	1	1	1	3	2	4	4	1	4	4	4	4	4	29	4	4	4	21	0	1	4	2	86	28	2	116	0.02	4	4	4	4
1	24	1	2	3	2	1	3					3	3	2	2	1	1	2	1	1	1	5	2	4	4	4	4	4	5	5	4	34	4	5	4	26	0	2	4	3	71	0	1	72	-2.25	5	5	5	5
1	30	2	1	4	2	1	3					4	4	2	2	1	1	2	1	2	1	4	2	3	5	4	5	5	5	4	4	35	4	5	5	30	0	4	4	4	52	0	1	53	-3.16	6	6	4	4
1	30	2	1	5	2	2	4					3	3	2	1	1	1	1	1	1	1	3	2	4	4	4	4	4	4	4	5	33	3	4	4	26	0	4	4	4	95	0	1	96	-1.1	5	4	5	4
1	29	1	2	4	1	1	4					3	3	2	2	2	1	1	1	1	1	5	2	3	4	4	4	4	5	5	3	32	4	4	4	25	0	3	4	4	1	0	1	2	-5.6	3	3	3	2
1	28	1	1	4	2	1	4					4	4	2	2	1	1	2	1	2	1	4	2	3	4	5	5	5	5	5	4	36	1	4	5	25	0	5	5	4	71	0	1	72	-2.25	5	4	5	5
1	27	1	1	4	2	1	4					3	3	2	2	2	1	1	2	1	1	6	2	4	4	4	4	4	4	4	4	32	4	5	3	28	0	4	4	4	77	19	3	99	-0.09	5	4	4	4
1	23	1	1	4	2	1	4					4	4	2	2	1	1	1	1	2	1	3	2	4	5	5	5	5	5	5	5	39	5	5	5	30	0	4	5	3	64	0	1	65	-2.59	5	5	5	5
1	27	1	2	3	2	1	4					4	4	2	1	1	1	2	1	1	1	2	2	4	4	4	5	5	4	5	4	35	4	4	4	26	0	4	4	3	52	27	2	81	-1.64	4	4	3	2
1	27	1	2	3	1	1	4					3	4	2	2	2	1	1	1	2	1	5	2	4	4	4	3	4	4	5	4	32	5	5	5	33	0	4	4	5	71	13	2	86	-1.2	3	2	3	1
1	28	1	2	4	2	1	4					3	3	2	1	1	1	1	1	1	1	3	2	4	4	4	4	4	4	4	4	32	3	4	3	25	0	4	4	4	15	0	1	16	-4.93	4	4	4	3
1	28	1	1	4	2	1	3					4	4	2	1	2	1	3	1	2	1	5	2	5	5	5	5	5	5	5	5	40	5	5	5	35	0	5	5	5	71	19	2	92	-1	5	4	3	3
1	26	1	1	3	1	2	3					3	3	2	2	1	1	2	1	1	1	5	2	3	4	2	5	5	5	5	4	33	5	4	4	28	0	5	4	2	15	14	2	31	-3.84	6	6	5	2
1	29	1	1	5	2	1	4					3	3	2	2	2	1	2	2	2	1	8	2	4	4	4	4	4	4	4	4	32	4	3	4	24	0	4	4	3	86	22	2	110	-0.18	4	4	4	4
1	28	1	2	3	2	1	4					4	4	2	1	1	1	2	1	1	1	2	2	5	5	5	4	5	5	5	4	38	4	4	4	26	0	4	4	3	71	7	2	80	-1.4	5	4	4	4
1	24	1	1	4	1	1	3					3	3	2	2	1	1	2	1	2	1	6	2	4	4	4	4	4	4	4	4	32	4	4	4	26	0	4	4	3	64	12	2	78	-1.57	5	5	5	1
1	30	2	1	4	2	1	3					3	3	2	2	2	1	2	1	1	1	6	2	4	4	4	4	4	4	4	4	32	3	4	3	24	0	4	4	3	71	18	3	92	-0.41	5	4	3	1
1	29	1	1	4	2	1	3					3	3	2	2	2	1	2	2	2	1	8	2	4	4	4	4	4	4	5	3	32	3	4	4	24	0	3	4	3	77	0	1	78	-1.96	5	4	3	4
1	31	2	2	3	2	1	4					3	4	2	1	1	1	1	1	1	1	2	2	4	5	5	4	5	4	4	4	35	4	4	4	30	0	5	5	4	64	11	2	77	-1.6	5	5	4	4
1	28	1	2	3	2	2	3					3	3	2	2	2	1	2	2	2	1	8	2	4	4	3	3	4	3	4	4	29	4	4	3	27	0	4	4	4	52	37	2	91	-1.3	4	5	4	2
1	25	1	2	4	2	2	1					3	3	2	2	2	1	2	2	2	1	8	2	3	4	3	4	4	4	4	4	30	3	4	4	24	0	3	4	3	91	14	2	107	-0.21	4	4	4	4
1	32	2	1	5	2	1	4					3	3	1	1	1	1	1	1	1	1	2	2	3	4	4	4	4	4	4	3	30	4	4	4	26	0	3	4	4	95	4	2	101	-0.35	4	4	4	4
1	29	1	1	5	2	1	4					3	3	2	2	2	1	2	2	2	1	8	2	4	4	3	3	4	5	4	3	30	3	4	4	25	0	3	4	4	80	3	2	85	-1.1	5	5	4	4
1	28	1	2	4	2	1	4					3	3	2	2	1	1	1	1	2	1	5	2	3	4	4	4	4	4	4	4	31	4	4	4	27	0	3	4	4	25	0	1	26	-4.45	4	4	4	4
1	28	1	1	3	2	1	4					3	3	2	2	1	1	2	1	2	1	6	2	3	5	3	4	4	4	4	3	30	4	4	4	26	0	3	4	3	71	18	3	92	-0.41	5	2	2	2
1	24	1	1	4	2	1	4					3	3	2	2	2	1	1	1	2	1	6	2	3	4	4	4	4	4	4	4	31	4	4	4	28	0	4	4	4	64	6	2	72	-1.77	5	5	5	5
1	27	1	1	4	2	1	3					3	3	2	2	1	1	1	2	2	1	6	2	4	3	4	4	4	4	4	4	31	4	4	4	27	0	4	4	4	86	6	2	94	-0.71	4	5	5	5
1	34	2	2	4	2	1	1					2	4	2	2	2	1	1	2	2	1	7	2	3	4	4	3	3	3	4	4	28	3	4	4	25	0	4	4	3	71	0	1	72	-2.25	4	4	4	4
1	31	2	1	4	2	1	4					3	4	2	2	2	1	2	2	2	1	7	2	4	3	2	3	4	4	4	3	27	5	4	4	26	0	3	3	3	80	16	3	99	-0.05	5	3	3	4
1	30	2	1	4	2	1	2					4	4	1	1	1	1	1	1	2	1	1	2	3	5	4	4	4	5	4	4	33	3	3	4	21	0	3	4	2	52	0	1	53	-3.16	5	4	4	4
1	28	1	1	3	2	1	3					3	3	3	1	1	1	2	1	1	1	5	2	3	3	5	5	5	5	4	4	34	4	3	3	22	0	3	3	3	64	0	1	65	-2.59	4	4	4	4
1	27	1	1	3	2	1	3					4	4	1	2	2	1	1	1	2	1	3	2	4	5	5	5	5	5	5	3	37	4	4	5	19	0	1	3	1	71	0	1	72	-2.25	4	4	2	2
1	28	1	2	3	1	1	3					3	4	2	1	1	2	1	2	1	1	4	2	4	4	3	4	5	5	5	3	33	3	3	3	19	0	2	3	3	58	57	2	117	-0.35	5	5	2	1
1	28	1	1	4	1	1	4					3	3	2	2	2	1	1	2	2	1	7	2	3	5	4	4	4	4	5	4	33	3	4	3	22	0	4	3	2	71	19	2	92	-1	5	5	3	3
1	28	1	2	4	2	1	3					3	3	2	2	2	1	2	1	2	1	7	2	4	4	4	4	4	4	4	4	32	3	4	2	21	0	3	4	3	77	0	1	78	-1.96	3	3	3	2
1	26	1	1	3	2	2	3					3	3	3	2	1	1	2	1	2	1	7	2	3	4	5	4	4	3	4	3	30	2	3	3	20	0	3	4	3	86	0	1	87	-1.53	4	4	4	4
1	24	1	1	2	2	1	3					2	3	2	2	1	1	2	1	2	1	7	2	3	3	4	3	3	3	4	4	27	3	3	3	22	0	3	4	3	64	0	1	65	-2.59	5	4	4	4
1	26	1	1	4	2	1	4					3	3	2	2	2	2	1	2	1	1	7	2	4	3	3	3	3	4	4	4	28	3	3	3	20	0	3	3	3	80	22	2	104	-0.47	4	4	4	2
1	27	1	1	4	2	2	4					3	3	2	1	1	1	1	1	1	1	3	2	3	4	3	3	4	5	4	4	30	3	3	4	23	0	4	4	3	71	19	2	92	-1	4	4	4	4
1	28	1	1	5	2	1	4					3	3	2	2	2	1	2	2	2	1	8	2	4	4	4	4	4	4	3	3	30	2	4	4	20	0	3	3	2	91	20	2	113	-0.01	5	5	3	3
1	31	2	1	4	2	1	2					3	4	1	2	2	1	1	1	1	1	3	2	5	4	5	3	5	4	5	4	35	5	5	3	26	0	5	4	3	80	55	2	137	0.64	3	3	3	1
1	27	1	1	4	2	1	4					4	4	2	2	2	1	1	1	2	1	4	2	3	4	4	5	5	5	4	4	34	3	4	3	26	0	4	4	4	86	61	4	151	2.37	4	3	3	2
1	30	2	1	4	2	1	4					4	4	2	2	2	1	2	1	2	1	5	2	3	4	5	5	5	5	5	5	37	3	4	4	24	0	4	4	3	86	15	3	104	0.21	4	2	1	1
1	20	1	2	2	2	1	1					4	4	2	2	2	1	2	2	2	1	6	2	4	4	4	4	4	4	4	4	32	4	4	4	28	0	4	4	4	53	52	4	109	0.48	3	3	1	1
1	25	1	2	4	1	2	3					3	3	2	2	2	1	2	1	1	1	6	2	4	4	4	4	4	4	4	4	32	4	4	4	24	0	3	3	3	86	33	2	121	0.19	3	3	3	3
1	26	1	2	3	2	1	4					3	3	1	1	1	1	2	1	2	1	4	2	4	4	4	4	5	4	5	4	34	4	4	4	27	0	4	4	4	64	63	2	129	0.14	4	2	2	2
1	29	1	2	5	1	1	4					3	3	2	2	1	1	2	2	1	1	6	2	5	4	4	4	4	4	4	4	33	4	4	5	26	0	4	4	2	95	42	3	140	1.54	4	3	3	2
1	31	2	1	2	2	2	2					2	4	2	2	2	1	2	1	2	1	7	2	5	3	4	4	4	4	5	5	34	4	2	5	27	0	4	5	2	64	53	3	120	0.43	4	4	3	2
1	29	1	1	4	1	1	4					3	4	2	2	1	1	1	1	1	1	3	2	4	4	5	4	4	4	4	3	32	3	4	4	24	0	4	4	3	86	62	3	151	1.78	3	2	1	1
1	30	2	1	4	2	1	4					4	4	2	2	1	1	2	1	2	1	4	2	4	5	4	4	5	5	5	3	35	4	4	4	26	0	4	4	2	86	28	5	119	1.88	5	5	3	4
1	29	1	2	3	1	1	2					3	4	2	2	2	2	2	2	2	1	8	2	2	4	5	4	5	3	5	4	32	4	4	3	24	0	3	3	3	80	28	4	112	0.97	3	4	2	1
1	31	2	1	3	1	1	4					2	3	2	2	1	1	2	2	2	1	8	2	4	4	4	5	5	5	5	5	37	3	4	4	24	0	4	4	3	77	66	5	148	2.72	5	4	1	1
1	30	2	2	5	1	1	4					4	4	2	2	2	2	2	2	2	1	7	2	5	5	5	5	5	5	5	5	40	5	5	5	35	0	5	5	5	77	76	3	156	1.82	3	3	3	1
1	26	1	2	5	2	1	4					4	4	2	1	1	1	1	2	1	1	2	2	4	5	4	5	5	4	4	4	35	4	4	4	27	0	4	4	4	95	70	6	171	4.33	4	4	3	3
1	28	1	2	4	1	2	4					3	3	2	2	2	1	2	1	1	1	6	2	4	4	4	4	5	4	4	4	33	4	5	5	27	0	4	4	3	86	85	3	174	2.55	3	3	1	2
1	35	2	1	3	1	1	3					4	4	1	2	1	1	2	1	1	1	2	2	5	4	4	4	4	4	5	4	34	4	4	4	26	0	4	4	3	86	34	3	123	0.84	3	3	2	2
1	26	1	1	3	2	1	3					3	3	2	2	2	1	2	1	1	1	6	2	4	4	4	4	4	4	4	4	32	4	4	4	25	0	4	4	3	86	80	7	173	4.86	5	5	3	3
1	33	2	1	5	2	1	3					3	2	2	2	2	1	2	1	2	1	8	2	4	4	3	4	4	4	4	4	31	4	4	4	27	0	4	4	4	91	27	3	121	0.85	4	1	1	1
1	33	2	1	2	2	1	4					3	3	2	1	1	1	2	1	1	1	4	2	3	3	3	2	2	4	4	3	24	4	3	3	24	0	4	4	3	86	33	2	121	0.19	4	4	3	2
1	27	1	2	4	1	1	3					4	3	2	2	1	1	1	1	1	1	3	2	4	4	4	3	4	4	4	4	31	3	4	4	26	0	4	5	3	86	85	5	176	3.79	4	4	3	2
1	38	2	1	4	2	1	3					2	3	2	1	2	1	2	2	1	1	7	2	3	4	4	3	2	3	4	4	27	4	4	4	28	0	4	4	4	86	71	4	161	2.7	2	2	2	2
1	28	1	2	4	1	1	3					3	3	2	1	1	1	2	1	1	1	4	2	4	4	4	4	4	4	4	3	31	4	4	4	28	0	4	4	4	86	85	3	174	2.55	4	2	2	2
1	30	2	1	4	1	1	4					3	3	2	2	2	1	2	1	2	1	7	2	3	3	3	4	4	4	4	4	29	3	4	3	25	0	3	4	4	91	39	3	133	1.25	4	3	3	3
1	29	1	1	5	2	1	4					3	3	2	2	1	1	3	2	2	1	8	2	4	4	4	2	4	2	3	2	25	4	4	4	26	0	4	4	4	86	28	2	116	0.02	3	4	2	2
1	28	1	1	4	2	1	4					3	3	1	1	1	1	1	1	1	1	2	2	4	4	4	4	4	4	5	3	32	3	3	3	20	0	3	3	3	91	43	4	138	2	4	4	4	4
1	28	1	2	4	1	1	4					3	4	2	2	2	1	2	2	2	1	7	2	3	4	3	5	5	4	5	4	33	3	4	4	23	0	3	3	3	86	61	3	150	1.75	5	4	4	3
1	27	1	1	4	2	1	3					3	3	2	2	1	1	2	1	2	1	6	2	4	4	4	4	4	4	5	4	33	3	4	4	22	0	3	3	3	86	71	2	159	1.46	4	3	2	1
1	29	1	2	4	1	1	4					3	3	1	2	1	2	2	2	2	2	8	2	5	5	4	4	4	4	4	3	33	3	4	4	22	0	3	4	2	77	66	4	147	2.1	3	3	3	3
1	36	2	1	3	1	1	4					3	4	2	2	1	1	2	2	2	1	6	2	4	4	4	4	4	4	4	4	32	4	4	4	23	0	3	3	3	86	34	4	124	1.46	4	2	2	1
1	27	1	1	4	2	1	4					3	3	1	2	1	1	2	2	2	1	6	2	5	5	5	5	5	4	3	2	34	1	3	3	13	0	2	2	1	86	71	4	161	2.7	4	2	1	1
1	30	2	1	4	2	1	3					3	3	2	2	1	1	2	1	2	1	6	2	4	4	3	5	5	5	4	4	34	3	4	4	23	0	3	3	4	58	52	6	116	1.96	6	5	2	1
1	31	2	1	4	1	1	4					3	3	2	1	1	1	2	1	2	1	5	2	5	5	5	5	5	4	4	3	36	3	4	4	20	0	2	3	2	71	56	3	130	0.86	3	3	1	1
1	25	1	2	4	1	1	4					3	3	2	2	2	1	2	2	2	1	8	2	4	5	4	3	4	3	4	3	30	3	4	3	21	0	4	3	2	86	28	2	116	0.02	3	2	2	1
1	28	1	2	4	2	1	4					3	3	1	1	1	1	2	1	1	1	3	2	4	4	3	4	3	4	4	4	30	2	3	3	16	0	2	3	1	77	25	4	106	0.73	3	3	2	1
1	23	1	2	2	2	1	3					2	3	2	3	1	2	1	1	2	1	8	2	3	3	3	2	2	4	4	3	24	3	3	2	22	0	4	4	3	71	51	3	125	0.69	5	4	3	2
1	26	1	1	5	2	2	4					4	4	2	2	2	2	1	2	2	1	6	2	3	4	4	2	2	4	4	2	25	3	3	3	19	0	2	2	4	86	28	3	117	0.64	4	4	2	2
1	28	1	2	3	1	2	3					3	2	2	2	1	1	2	2	1	1	7	2	4	4	3	3	4	2	4	2	26	2	3	3	14	0	2	2	1	86	85	2	173	1.93	5	5	1	2
1	28	1	2	3	2	1	4					3	4	2	2	1	1	2	2	2	1	6	2	2	3	4	3	4	3	4	3	26	3	4	3	20	0	3	3	2	86	85	5	176	3.79	3	4	2	3
1	29	1	2	5	2	1	3					2	2	2	2	1	1	1	1	2	1	7	2	3	4	3	3	4	4	4	3	28	4	3	3	22	0	3	3	3	95	89	6	190	4.97	5	5	1	1
1	28	1	1	4	2	1	2					4	4	2	2	2	1	1	1	1	1	3	2	4	4	4	4	4	4	3	4	31	3	3	3	21	0	4	4	2	91	38	4	133	1.83	4	3	3	3
1	29	1	1	4	1	1	4					4	4	2	1	1	1	1	1	1	1	1	2	3	4	4	2	3	3	4	3	26	2	3	3	18	0	3	3	2	64	49	4	117	0.91	4	4	1	1
1	28	1	1	4	2	1	3					3	3	2	2	2	1	1	1	1	1	5	2	3	4	3	4	4	4	4	4	30	3	4	4	23	0	3	4	3	86	28	4	118	1.26	5	5	5	4
1	33	2	2	3	1	1	4					4	4	2	1	1	2	2	2	2	1	5	2	3	3	2	3	4	2	4	3	24	3	3	3	21	0	3	3	3	71	70	5	146	2.57	5	2	1	1
1	26	1	1	3	2	1	3					2	3	2	1	1	1	1	1	1	1	4	2	3	4	4	3	4	3	3	3	27	3	3	4	17	0	2	2	2	86	85	6	177	4.41	3	3	2	4
1	29	1	1	4	2	1	3					3	4	2	2	1	1	2	2	2	1	6	2	3	4	4	2	2	4	4	4	27	2	4	3	22	0	4	4	3	77	52	5	134	2.25	4	4	4	4
1	26	1	1	4	2	1	3					3	4	3	2	1	1	1	2	2	1	6	2	4	4	4	4	4	3	4	3	30	3	3	3	20	0	4	3	3	86	71	2	159	1.46	2	2	1	1
1	26	1	2	3	2	2	3					3	3	2	2	2	1	2	2	2	1	8	2	4	4	3	2	3	3	3	2	24	3	3	3	20	0	3	3	3	77	25	5	107	1.35	4	4	3	2
1	29	1	1	3	1	1	4					3	3	2	1	1	1	1	1	1	1	3	2	3	4	4	4	4	4	4	3	30	3	4	3	21	0	4	4	2	86	75	5	166	3.45	4	4	1	1
1	31	2	1	5	1	1	3					3	3	2	2	1	1	1	1	2	1	5	2	4	4	4	4	4	3	4	2	29	3	2	2	16	0	2	3	2	86	85	3	174	2.55	4	4	2	2
1	32	2	1	2	2	1	4					4	4	2	1	1	2	1	1	2	1	3	2	2	4	3	4	4	5	5	3	30	1	4	3	20	0	2	4	3	91	80	5	176	3.86	4	4	3	1
1	37	2	1	3	1	1	1					3	3	2	2	1	2	2	2	2	1	8	2	4	3	3	3	3	3	3	3	25	3	3	2	19	0	3	3	2	77	25	3	105	0.11	3	3	3	3
1	29	1	1	4	2	1	4					4	4	2	2	2	1	2	2	2	1	6	2	4	4	3	4	4	3	4	3	29	3	3	3	20	0	3	3	2	86	61	3	150	1.75	4	4	4	2
1	26	1	2	4	2	1	3					4	4	2	2	2	2	2	2	2	2	8	2	3	3	4	4	4	4	4	4	30	3	3	4	23	0	3	3	3	77	25	3	105	0.11	5	4	3	3
1	27	1	1	4	1	2	4					2	3	2	2	2	1	2	1	1	1	7	2	3	4	4	3	4	4	3	3	28	3	4	3	20	0	3	3	2	86	85	3	174	2.55	4	4	4	3
1	27	1	1	4	2	1	4					2	3	2	2	2	2	2	1	1	1	8	2	2	3	3	2	1	4	4	3	22	3	4	3	19	0	2	3	2	71	56	2	129	0.24	5	2	1	4
1	34	2	1	4	1	1	4					2	2	1	1	1	2	2	2	2	1	8	2	3	4	4	3	3	3	4	3	27	3	3	2	22	0	4	3	3	86	33	2	121	0.19	4	4	1	1
1	26	1	2	4	2	1	4					3	4	2	1	1	1	1	1	1	1	2	2	4	4	4	3	4	4	4	3	30	3	4	3	22	0	3	3	3	86	85	6	177	4.41	3	4	3	3
1	27	1	1	4	1	2	3					3	3	1	2	1	1	2	2	1	1	5	2	3	3	4	4	5	4	4	4	31	3	3	3	21	0	4	3	3	71	56	2	129	0.24	4	4	1	1
1	28	1	1	4	2	1	4					3	3	1	2	1	1	1	1	1	1	3	2	3	3	3	4	4	3	4	2	26	3	3	3	17	0	1	3	2	64	63	2	129	0.14	4	4	4	1
1	30	2	1	4	2	1	4					3	3	2	2	2	1	1	1	2	1	6	2	4	4	3	3	4	4	4	4	30	2	4	3	21	0	4	3	3	86	34	3	123	0.84	4	4	2	1
1	27	1	1	4	2	1	3					3	4	2	2	2	1	2	2	2	1	7	2	3	5	5	5	5	5	5	4	37	4	4	3	24	0	4	5	2	52	27	3	82	-1.02	3	2	1	2
1	29	1	2	5	1	1	4					3	3	2	2	2	1	1	2	2	1	7	2	4	4	4	4	4	4	5	4	33	4	4	4	25	0	3	4	3	86	0	1	87	-1.53	4	4	2	3
1	28	1	2	3	2	1	3					3	4	1	1	1	1	2	2	2	1	4	2	4	5	5	4	4	4	4	4	34	4	4	4	27	0	3	4	3	80	3	2	85	-1.1	3	2	1	1
1	24	1	2	3	2	2	4					4	4	2	2	2	1	2	1	1	1	4	2	4	4	4	4	4	4	4	4	32	4	4	4	26	0	4	4	3	58	0	1	59	-2.87	4	4	3	3
1	25	1	2	2	2	1	1					4	4	2	1	1	1	2	1	2	1	3	2	4	4	4	5	5	5	5	5	37	5	5	5	35	0	5	5	5	1	0	1	2	-5.6	1	1	1	1
1	26	1	1	4	1	2	4					3	3	2	2	2	2	2	1	1	1	7	2	4	4	4	4	4	4	4	4	32	4	3	3	26	0	4	4	4	64	6	2	72	-1.77	4	4	4	4
1	38	2	1	5	1	1	4					2	3	3	2	1	1	1	2	1	1	7	2	4	4	4	4	4	4	4	4	32	3	4	4	25	0	4	4	3	91	0	1	92	-1.29	4	4	4	2
1	32	2	2	4	1	1	4					4	4	2	2	2	2	2	1	2	1	6	2	4	4	4	4	4	4	4	4	32	4	4	4	27	0	4	4	4	71	13	2	86	-1.2	2	2	2	2
1	35	2	2	2	1	1	4					4	4	2	1	1	1	1	1	1	1	1	2	4	4	4	3	4	5	5	5	34	4	4	4	28	0	4	4	4	64	6	2	72	-1.77	3	3	3	3
1	25	1	1	3	1	1	3					2	3	2	1	1	1	2	1	2	1	6	2	4	4	4	4	4	4	4	4	32	3	4	4	26	0	4	4	3	64	0	1	65	-2.59	4	4	4	3
1	28	1	1	4	1	1	4					2	4	1	2	1	1	2	2	2	1	6	2	4	4	4	4	4	4	4	4	32	4	4	4	27	0	4	4	3	64	11	3	78	-0.98	5	3	3	3
1	29	1	1	3	2	2	4					3	3	2	2	1	1	2	2	1	1	6	2	3	5	3	3	4	3	4	3	28	3	5	4	26	0	3	4	3	71	13	2	86	-1.2	5	4	4	1
1	32	2	1	4	2	1	4					3	4	1	1	1	1	1	1	1	1	1	2	2	4	4	4	5	4	4	3	30	3	4	4	24	0	4	4	3	80	9	2	91	-0.9	3	4	2	2
1	23	1	2	1	1	1	2					3	3	1	2	1	1	2	1	2	1	5	2	4	4	4	4	4	3	4	4	31	3	4	4	27	0	4	4	4	15	0	1	16	-4.93	4	4	4	3
1	32	2	1	3	1	1	4					3	4	1	2	2	1	2	2	2	1	6	2	4	4	3	4	4	4	4	3	30	4	4	4	25	0	3	3	3	15	0	1	16	-4.93	5	4	3	3
1	23	1	1	3	2	1	2					4	3	2	2	2	1	1	1	2	1	5	2	4	4	4	3	3	5	5	3	31	3	4	4	25	0	4	4	3	64	11	2	77	-1.6	5	4	3	2
1	27	1	2	5	1	1	4					3	4	2	2	1	1	2	2	2	1	6	2	3	4	5	5	4	4	5	4	34	3	3	3	22	0	5	5	2	58	5	2	65	-2.09	3	1	1	1
1	30	2	1	4	2	1	4					3	3	1	2	2	1	1	1	2	1	5	2	4	4	4	5	4	4	4	3	32	3	3	3	17	0	2	2	2	71	0	1	72	-2.25	4	5	2	2
1	27	1	1	4	2	1	3					3	4	1	2	2	1	2	1	1	1	4	2	4	5	5	3	5	5	5	5	37	2	5	2	23	0	5	5	2	86	0	1	87	-1.53	2	2	1	1
1	25	1	2	2	1	1	3					3	3	2	1	1	1	2	1	2	1	5	2	3	4	4	4	4	4	5	4	32	3	4	4	23	0	3	4	3	58	0	1	59	-2.87	4	1	1	1
1	25	1	1	4	1	2	4					4	4	1	2	2	1	1	1	1	1	2	2	4	4	4	4	4	4	4	4	32	3	4	4	23	0	4	4	2	86	9	2	97	-0.61	4	4	4	3
1	28	1	1	4	2	1	1					4	3	2	2	1	1	2	1	1	1	4	2	2	4	4	5	5	5	4	4	33	3	4	3	23	0	3	4	3	80	0	1	81	-1.82	5	5	1	1
1	32	2	1	3	2	1	1					3	3	1	1	1	1	1	1	1	1	2	2	4	4	4	4	4	4	4	4	32	1	4	4	23	0	4	4	3	71	19	2	92	-1	5	4	1	1
1	29	1	2	4	1	1	4					3	3	2	2	2	1	2	2	2	1	8	2	4	4	4	4	4	4	4	4	32	3	4	3	21	0	3	4	2	71	7	2	80	-1.4	4	4	2	1
1	25	1	2	4	1	1	4					3	3	1	2	2	2	2	1	2	1	7	2	4	3	4	4	4	4	5	5	33	3	3	5	22	0	4	4	2	25	0	1	26	-4.45	1	1	1	1
1	32	2	1	4	1	1	3					4	4	2	2	2	1	1	1	2	1	4	2	3	5	5	5	5	4	4	5	36	3	4	3	23	0	3	4	3	64	11	2	77	-1.6	4	2	1	1
1	25	1	1	4	2	1	4					3	3	3	2	2	1	2	2	1	1	8	2	4	4	4	5	5	5	3	3	33	3	3	4	21	0	4	3	3	11	0	1	12	-5.12	4	1	2	1
1	27	1	2	4	1	2	4					3	3	2	2	2	1	1	1	1	1	5	2	4	4	3	4	4	4	5	4	32	2	3	3	16	0	2	2	2	25	24	2	51	-3.03	4	2	1	1
1	28	1	1	4	2	1	4					3	3	1	2	2	1	1	2	2	1	6	2	3	4	4	2	5	4	4	3	29	3	4	4	22	0	3	3	3	80	0	1	81	-1.82	4	4	3	4
1	27	1	1	4	2	1	1					3	4	2	1	1	1	2	1	1	1	3	2	2	4	4	4	4	4	4	3	29	3	3	3	19	0	3	3	2	58	57	2	117	-0.35	4	3	3	1
1	30	2	2	4	1	1	4					3	3	2	2	2	1	2	2	2	1	8	2	4	4	3	3	3	3	4	3	27	3	3	3	20	0	3	3	3	24	0	1	25	-4.5	4	2	2	1
1	28	1	2	2	2	1	4					3	3	2	2	2	1	2	1	2	1	7	2	3	3	3	3	4	4	3	3	26	3	3	3	21	0	3	3	3	1	0	1	2	-5.6	4	4	4	1
1	29	1	1	4	2	1	4					3	3	2	2	2	1	1	2	1	1	6	2	3	4	4	3	3	3	3	3	26	3	3	3	21	0	3	3	3	86	0	2	88	-0.92	5	3	3	1
1	29	1	1	4	2	1	4					3	4	1	2	1	1	1	1	1	1	2	2	4	4	3	4	4	3	4	3	29	2	2	2	16	0	3	3	2	77	0	1	78	-1.96	3	2	1	1
1	23	1	1	3	1	1	2					3	3	2	2	1	1	1	1	1	1	4	2	3	4	4	4	4	4	4	4	31	3	3	3	22	0	4	4	3	15	0	1	16	-4.93	4	3	3	2
1	26	1	1	4	1	1	3					2	3	2	2	2	1	2	1	1	1	7	2	3	3	4	3	4	3	4	3	27	3	3	3	20	0	4	3	2	53	1	2	56	-2.46	5	4	3	2
1	28	1	2	3	1	1	4					3	4	1	2	1	1	2	1	2	1	4	2	4	4	4	3	3	4	4	4	30	3	4	3	19	0	3	3	2	71	19	2	92	-1	5	5	2	4
1	33	2	1	4	2	2	4					2	3	2	2	1	1	1	2	1	1	6	2	4	4	5	4	3	3	3	3	29	2	3	3	17	0	2	3	2	86	0	1	87	-1.53	4	3	1	1
1	33	2	2	4	2	1	4					2	4	2	1	1	1	2	2	2	1	6	2	3	3	3	4	4	4	4	3	28	3	4	4	22	0	3	3	3	71	0	1	72	-2.25	4	3	2	1
1	30	2	2	5	2	1	4					3	3	2	2	2	1	2	2	2	1	8	2	4	3	3	3	4	4	4	3	28	3	3	3	21	0	3	3	3	86	0	1	87	-1.53	4	4	4	3
1	32	2	1	4	1	1	4					3	3	2	2	1	1	2	1	2	1	6	2	4	3	4	3	3	3	4	3	27	3	3	2	17	0	3	3	2	71	0	1	72	-2.25	4	4	1	1
1	26	1	1	4	2	1	3					3	4	1	2	2	1	1	1	2	1	4	2	4	3	4	3	3	2	4	3	26	3	3	3	15	0	2	2	1	52	37	2	91	-1.3	5	2	1	1
1	28	1	2	2	2	1	4					3	4	2	2	1	1	1	1	1	1	3	2	4	4	4	3	4	4	4	3	30	3	3	3	19	0	3	3	2	64	39	3	106	-0.04	5	4	2	2
1	26	1	2	3	2	1	4					2	2	2	1	1	1	1	1	1	1	5	2	2	4	4	2	2	2	4	3	23	2	3	3	18	0	2	2	3	71	19	3	93	-0.38	4	4	3	4
1	36	2	1	4	1	1	3					3	3	2	2	2	2	2	2	1	1	8	2	3	4	3	3	3	3	4	1	24	3	3	3	16	0	1	4	1	86	0	2	88	-0.92	4	4	2	2
1	26	1	1	3	2	1	3					3	4	1	1	1	1	2	2	2	1	4	2	4	3	3	4	4	4	4	3	29	5	4	3	22	0	3	3	2	91	0	1	92	-1.29	2	2	2	2
1	32	2	2	4	2	1	4					4	4	1	1	1	1	1	1	1	1	0	2	4	4	4	4	4	4	4	2	30	3	4	3	18	0	2	2	2	71	19	2	92	-1	2	1	1	1
1	30	2	1	4	1	1	4					3	3	2	1	1	2	2	1	2	1	6	2	4	3	4	3	3	4	5	3	29	3	3	3	20	0	4	3	2	58	38	3	99	-0.36	3	2	1	1
1	25	1	2	4	2	1	2					2	3	2	1	1	1	1	1	2	1	5	2	3	3	2	2	3	3	3	2	21	2	4	4	20	0	3	3	2	53	52	2	107	-0.75	2	4	1	1
1	34	2	1	2	1	1	3					4	4	1	1	1	1	2	1	2	1	2	2	4	3	2	3	3	3	4	3	25	2	3	2	17	0	3	3	2	15	0	1	16	-4.93	3	1	1	1
1	28	1	2	4	2	1	4					2	3	1	2	2	1	2	2	2	1	8	2	3	4	4	3	2	4	4	3	27	4	4	4	23	0	3	3	2	58	0	1	59	-2.87	3	4	4	3
1	33	2	1	4	1	1	4					3	4	2	1	1	1	1	2	2	1	4	2	2	4	4	4	4	4	4	3	29	3	4	3	19	0	3	3	2	15	0	1	16	-4.93	5	3	1	1
1	27	1	1	4	2	1	2					3	3	1	1	2	1	1	1	1	1	3	2	3	3	3	3	3	3	3	3	24	3	3	3	21	0	3	3	3	53	1	2	56	-2.46	4	4	4	4
1	32	2	1	4	1	1	4					2	2	1	1	1	1	1	2	1	1	5	2	3	4	4	3	3	3	4	3	27	3	4	4	23	0	4	4	3	71	19	2	92	-1	2	4	1	1
1	28	1	2	4	2	1	4					3	3	2	1	1	1	1	1	1	1	3	2	3	3	3	3	3	4	5	4	28	3	3	3	22	0	4	4	3	71	7	2	80	-1.4	4	4	4	3
1	29	1	1	5	1	2	4					3	3	2	2	1	1	2	1	2	2	7	2	4	4	4	3	3	3	4	4	29	4	4	3	22	0	3	3	2	53	1	2	56	-2.46	4	3	2	1
1	28	1	2	2	1	1	3					3	3	2	2	2	1	2	2	2	1	8	2	4	4	4	3	4	3	4	3	29	3	4	3	21	0	3	3	3	52	51	2	105	-0.83	4	4	2	2
1	26	1	1	5	1	2	3					3	3	3	2	1	1	2	1	1	1	6	2	4	3	4	4	4	4	4	4	31	2	3	2	18	0	4	3	2	86	0	1	87	-1.53	2	2	2	2
2												3	3	2	2	2	2	2	2	2	1	9	1	4	4	4	4	4	4	4	4	32	4	4	4	27	0	4	4	4	77	24	4	105	0.7	5	5	4	3
2												1	1	2	1	1	1	2	1	2	1	9	1	4	4	4	5	5	5	5	5	37	4	5	4	29	0	4	4	4	91	20	3	114	0.61	4	3	3	3
2												3	3	2	2	2	2	2	2	3	1	10	1	4	4	5	3	4	3	5	4	32	4	4	4	25	0	4	4	3	86	85	4	175	3.17	4	5	5	5
2												3	4	2	3	3	2	2	1	2	1	9	1	4	4	4	4	4	4	5	4	33	3	4	3	23	0	4	4	3	86	80	4	170	3	4	4	3	2
2												3	3	4	2	2	2	2	1	1	1	9	1	5	5	5	5	4	4	4	5	37	4	4	4	30	0	5	5	4	77	0	1	78	-1.96	4	4	4	4
2												4	4	2	3	3	2	2	2	2	1	9	1	4	5	3	5	5	5	5	2	34	4	4	5	31	0	4	4	5	71	7	2	80	-1.4	5	5	4	4
2												3	3	2	2	2	2	2	2	2	1	9	1	3	3	4	3	4	3	5	4	29	4	4	4	28	0	5	4	3	25	0	1	26	-4.45	4	5	2	2
2												3	3	2	2	2	1	2	2	2	2	9	1	5	4	4	3	4	5	5	4	34	3	4	3	21	0	3	3	3	86	15	2	103	-0.41	4	4	3	3
2												2	3	2	2	2	1	2	1	3	2	10	1	4	4	3	2	3	3	5	4	28	3	3	3	21	0	4	4	3	71	13	2	86	-1.2	3	5	4	3
2												2	2	2	3	3	2	2	2	3	1	14	1	4	3	2	3	5	3	5	3	28	4	5	4	23	0	2	3	2	86	15	2	103	-0.41	6	5	3	2
2												1	1	2	2	2	1	2	1	1	1	10	1	4	4	3	3	4	3	5	4	30	3	4	4	22	0	3	4	2	25	0	1	26	-4.45	2	3	4	3
2												3	2	2	3	2	2	3	2	2	1	12	1	2	3	3	3	4	4	4	2	25	3	4	3	19	0	2	3	2	95	0	1	96	-1.1	4	5	3	3
2												2	3	2	2	2	2	2	2	2	1	10	1	4	4	4	4	4	4	4	4	32	3	4	4	27	0	5	4	3	86	33	2	121	0.19	4	4	4	3
2												3	3	2	2	2	2	2	2	2	1	9	1	4	4	4	4	4	3	4	4	31	4	4	3	25	0	4	4	4	86	75	8	169	5.31	4	5	3	2
2												2	2	4	4	4	3	3	4	4	1	23	1	5	5	5	5	5	5	5	4	39	4	3	4	18	0	3	2	1	86	28	3	117	0.64	3	3	4	1
2												2	3	4	1	1	2	1	3	1	1	9	1	5	4	5	4	5	5	5	5	38	3	4	5	20	0	2	2	2	86	61	3	150	1.75	2	1	1	1
2												3	3	3	3	2	2	2	2	2	2	12	1	4	4	4	4	5	4	5	4	34	3	3	3	22	0	4	3	2	91	66	3	160	2.15	3	3	1	1
2												3	4	3	1	1	1	4	2	4	1	10	1	3	3	1	1	2	3	5	4	22	3	2	2	21	0	4	4	2	86	85	4	175	3.17	2	2	2	2
2												3	2	2	2	2	2	2	2	2	1	10	1	3	3	3	3	4	4	4	4	28	3	3	3	21	0	3	3	3	86	71	2	159	1.46	4	4	4	4
2												3	3	3	3	2	1	2	2	2	1	10	1	2	3	4	3	4	4	4	3	27	2	4	4	21	0	3	3	3	71	23	5	99	0.99	3	4	2	4
2												2	3	2	3	3	2	3	2	2	1	13	1	3	3	4	2	3	3	4	3	25	3	3	3	17	0	2	2	2	71	70	2	143	0.71	3	2	2	1
2												3	2	1	2	2	1	3	2	2	1	9	1	2	2	5	2	2	2	4	3	22	3	3	4	22	0	3	3	3	64	63	2	129	0.14	3	3	3	2
2												2	2	1	3	3	2	3	3	3	1	15	1	3	3	3	3	4	3	3	3	25	3	3	2	19	0	4	3	2	77	24	3	104	0.08	4	4	4	4
2												3	3	2	2	2	2	2	2	2	1	9	1	4	4	3	4	4	3	4	3	29	3	3	4	23	0	4	4	3	95	70	3	168	2.48	4	4	3	3
2												3	3	2	2	2	1	2	2	2	2	9	1	3	4	4	3	4	4	4	4	30	3	3	3	21	0	3	4	3	86	15	4	105	0.82	4	3	2	1
2												3	3	2	4	4	2	2	2	4	2	16	1	4	4	4	3	3	3	4	3	28	3	4	4	23	0	3	3	3	77	62	4	143	1.97	2	1	2	2
2												3	3	2	2	2	2	2	2	2	1	9	1	3	4	4	4	4	4	4	4	31	2	3	3	21	0	4	4	3	86	71	3	160	2.08	4	5	4	4
2												3	3	2	2	2	2	2	2	2	1	9	1	4	4	4	4	4	4	5	4	33	2	4	3	20	0	4	4	2	53	0	1	54	-3.11	2	1	1	1
2												3	4	2	3	2	2	2	2	2	1	9	1	2	4	3	3	3	3	4	4	26	2	4	4	18	0	2	3	2	95	0	1	96	-1.1	2	1	1	4
2												2	3	2	2	2	1	2	2	2	1	9	1	3	3	3	4	4	3	2	3	25	3	3	3	20	0	3	3	3	53	0	1	54	-3.11	3	1	1	1
2												3	3	3	3	3	3	3	3	2	1	15	1	3	3	3	3	3	3	3	3	24	3	3	3	21	0	3	3	3	11	10	2	23	-4.17	4	4	4	4
2												1	1	2	2	2	2	2	1	1	2	12	1	3	2	4	4	3	4	5	3	28	3	3	4	23	0	2	4	3	11	0	1	12	-5.12	4	5	2	1
2												2	3	3	2	2	1	2	1	2	1	9	1	3	3	2	3	4	3	4	3	25	4	4	3	23	0	4	3	2	15	0	1	16	-4.93	2	2	2	2
2												3	3	2	2	2	2	2	2	2	1	9	1	3	3	3	3	3	4	4	2	25	3	3	3	15	0	1	2	2	64	0	1	65	-2.59	4	3	3	2
2												4	3	2	2	2	2	3	2	2	1	9	1	3	4	5	3	3	4	4	1	27	3	4	3	16	0	1	3	1	86	0	1	87	-1.53	4	3	1	1
2												3	2	2	2	2	1	2	2	2	1	9	1	4	4	3	1	4	4	4	4	28	4	3	3	22	0	3	3	3	86	22	2	110	-0.18	4	3	3	2
2												2	3	2	3	2	1	2	2	2	1	10	1	3	4	4	4	4	4	3	3	29	2	3	3	18	0	3	3	2	77	24	2	103	-0.54	4	5	3	2
2												4	4	2	3	1	4	2	3	1	1	9	1	3	3	2	3	4	3	5	3	26	3	3	3	21	0	3	3	3	1	0	1	2	-5.6	1	2	1	1
2												3	3	2	2	2	2	2	2	2	1	9	1	4	5	4	4	3	3	4	3	30	3	4	3	21	0	2	4	3	80	27	2	109	-0.3	5	3	2	1
2												3	3	3	2	1	1	2	1	2	1	7	2	4	4	4	4	4	4	4	4	32	3	4	4	26	0	4	4	4	95	37	5	137	2.61	5	5	4	3
2												3	4	2	1	1	2	2	1	1	1	4	2	5	4	4	4	4	4	5	5	35	4	5	4	32	0	5	5	5	86	28	2	116	0.02	5	4	1	1
2												3	4	2	2	2	1	2	1	1	1	5	2	5	5	5	4	5	4	5	5	38	3	5	4	29	0	5	5	4	80	27	4	111	0.94	4	4	4	4
2												3	3	2	2	1	1	2	1	2	1	6	2	4	5	5	5	5	5	5	5	39	5	5	5	35	0	5	5	5	91	20	5	116	1.85	4	4	3	1
2												4	4	2	1	1	1	1	1	1	1	1	2	5	5	5	5	5	5	5	5	40	5	5	5	35	0	5	5	5	77	62	3	142	1.35	4	3	3	1
2												4	4	2	1	1	1	1	1	1	1	1	2	3	4	4	4	4	4	5	5	33	2	4	4	25	0	5	4	3	95	31	3	129	1.17	3	5	5	5
2												4	4	2	2	1	1	1	1	1	1	2	2	4	4	5	5	5	4	4	4	35	4	4	5	29	0	4	4	5	80	28	3	111	0.35	5	4	3	5
2												3	3	1	1	1	1	1	1	1	1	2	2	4	4	4	4	4	4	4	4	32	4	4	4	28	0	4	4	4	91	20	3	114	0.61	5	5	5	5
2												3	2	2	2	2	1	2	1	2	1	8	2	4	4	4	4	4	4	4	4	32	4	4	4	26	0	4	4	4	71	19	4	94	0.24	5	5	4	3
2												3	3	1	2	2	1	1	1	1	1	4	2	5	5	5	5	5	5	4	3	37	4	5	4	26	0	4	4	3	86	85	3	174	2.55	5	5	5	3
2												4	4	1	2	1	1	2	1	2	1	3	2	4	4	5	4	4	5	4	4	34	4	4	3	24	0	4	3	3	86	34	3	123	0.84	5	5	2	1
2												1	1	2	2	1	1	1	1	1	1	8	2	4	5	4	4	4	5	5	5	36	4	4	4	26	0	4	4	3	80	79	7	166	4.54	4	5	5	4
2												3	4	1	1	1	1	1	1	1	1	1	2	4	4	4	5	5	5	5	5	37	5	5	4	29	0	4	4	4	86	34	6	126	2.7	4	5	1	1
2												3	3	4	2	2	1	1	2	1	1	8	2	4	4	4	4	4	4	4	4	32	4	4	4	25	0	3	4	3	86	80	2	168	1.76	5	5	4	3
2												4	4	4	1	1	1	1	1	1	1	3	2	4	4	4	4	4	4	4	4	32	4	5	4	27	0	3	4	3	95	89	6	190	4.97	5	5	3	5
2												4	4	1	1	1	1	1	1	1	1	0	2	4	4	4	4	4	4	4	4	32	4	4	4	27	0	4	4	4	91	67	9	167	5.9	5	4	4	4
2												4	4	1	2	1	1	1	1	1	1	1	2	4	5	5	4	4	4	4	3	33	3	4	4	24	0	3	3	3	91	27	3	121	0.85	3	2	1	2
2												3	3	2	1	1	1	1	1	1	1	3	2	4	4	4	4	4	4	4	4	32	4	4	4	27	0	4	4	4	95	43	5	143	2.81	3	4	4	3
2												4	4	2	1	1	1	2	1	1	1	2	2	5	5	4	5	5	5	5	4	38	4	4	4	26	0	4	4	3	95	43	7	145	4.05	5	6	4	3
2												3	3	1	2	1	1	1	2	1	1	4	2	4	3	4	4	4	4	5	4	32	4	4	3	25	0	4	3	3	91	80	4	175	3.24	5	3	1	1
2												4	4	2	1	1	1	1	1	1	1	1	2	4	4	4	4	4	5	5	4	34	4	4	4	28	0	4	4	4	91	33	4	128	1.67	5	5	5	4
2												4	4	1	1	1	1	1	1	1	1	0	2	5	5	5	5	5	5	5	5	40	1	5	5	27	0	5	5	4	86	71	5	162	3.32	5	6	6	6
2												4	4	2	1	1	1	1	1	1	1	1	2	3	4	5	4	4	4	4	4	32	4	5	5	29	0	3	5	4	86	33	3	122	0.81	5	5	5	4
2												3	4	1	1	1	1	1	1	1	1	1	2	4	4	4	4	4	4	5	4	33	4	4	4	25	0	3	4	3	77	62	5	144	2.59	5	5	4	3
2												3	3	1	1	1	1	1	2	1	1	3	2	4	4	4	4	4	4	5	3	32	4	4	4	24	0	4	4	2	86	85	5	176	3.79	4	5	3	4
2												4	4	1	1	1	1	1	1	1	1	0	2	3	4	4	5	5	5	5	5	36	5	5	5	33	0	5	5	5	91	33	2	126	0.43	5	5	6	5
2												4	4	2	2	2	2	2	1	1	1	5	2	4	5	4	4	5	5	5	5	37	4	5	5	34	0	5	5	5	86	85	7	178	5.02	5	6	6	5
2												4	4	1	2	1	1	1	1	1	1	1	2	4	4	4	4	4	5	5	3	33	4	4	4	24	0	4	4	2	86	61	4	151	2.37	4	4	3	3
2												4	4	1	1	1	1	1	1	1	1	0	2	5	5	5	5	5	5	5	5	40	5	5	5	35	0	5	5	5	95	47	4	146	2.33	5	4	4	4
2												3	3	2	1	1	2	2	1	1	1	5	2	4	4	4	4	4	4	4	4	32	4	4	4	27	0	4	4	4	86	80	4	170	3	3	3	3	3
2												3	3	2	2	1	1	2	2	2	1	7	2	4	4	4	4	4	4	4	4	32	4	4	4	26	0	3	4	4	86	80	2	168	1.76	5	4	1	2
2												3	4	1	1	1	2	2	2	2	1	5	2	4	4	5	4	4	4	5	4	34	3	4	4	26	0	4	4	4	86	71	3	160	2.08	4	3	3	2
2												3	4	1	2	1	1	2	1	1	1	3	2	4	4	3	5	5	5	5	5	36	5	5	5	32	0	5	5	4	86	71	3	160	2.08	4	4	3	4
2												3	4	2	1	1	1	1	1	1	1	2	2	4	5	4	5	5	5	5	5	38	4	4	5	32	0	5	5	5	71	65	5	141	2.4	4	4	5	3
2												3	4	2	2	2	2	2	2	2	1	8	2	3	4	4	4	4	4	5	5	33	4	4	4	26	0	4	4	3	71	19	4	94	0.24	5	4	2	2
2												4	4	2	1	1	1	2	1	2	1	3	2	4	4	5	5	5	5	5	4	37	5	5	3	29	0	4	4	4	86	61	5	152	2.98	5	4	2	4
2												4	4	2	1	1	2	1	2	2	1	4	2	4	4	4	3	4	3	5	5	32	3	4	4	25	0	4	4	3	58	52	3	113	0.1	5	4	4	4
2												4	4	2	2	2	1	1	1	1	1	3	2	4	4	4	5	5	5	5	5	37	4	4	4	28	0	4	4	4	86	61	5	152	2.98	5	4	4	4
2												4	4	2	1	1	1	1	1	1	1	1	2	4	4	4	5	5	5	5	4	36	5	5	5	34	0	5	5	5	86	85	12	183	8.12	4	4	3	5
2												3	4	2	2	1	1	2	1	2	1	5	2	4	4	4	5	5	5	5	5	37	4	5	4	29	0	4	4	4	86	61	5	152	2.98	3	3	4	2
2												4	4	2	1	1	1	1	1	1	1	1	2	4	5	5	5	5	5	5	4	38	4	5	4	29	0	4	4	4	86	15	3	104	0.21	5	5	5	4
2												4	4	4	1	1	1	1	1	1	1	3	2	4	5	5	5	5	5	5	5	39	5	5	5	35	0	5	5	5	86	61	4	151	2.37	4	4	3	3
2												3	3	2	1	1	1	1	1	1	1	3	2	4	4	4	4	4	4	4	4	32	4	4	4	28	0	4	4	4	95	89	4	188	3.73	5	5	5	2
2												3	3	1	2	1	1	1	1	2	1	4	2	4	5	4	4	5	5	5	4	36	4	5	4	31	0	5	5	4	86	34	6	126	2.7	5	4	4	3
2												4	4	1	1	1	1	1	1	1	1	0	2	5	5	5	4	4	4	5	5	37	4	5	4	32	0	5	5	4	95	94	7	196	5.76	5	4	5	3
2												4	4	1	1	1	1	1	1	2	1	1	2	5	5	5	5	5	5	5	5	40	5	5	5	32	0	5	4	4	95	9	4	108	1.05	5	5	5	5
2												4	4	2	1	1	1	2	2	3	1	5	2	5	5	5	5	5	5	5	5	40	4	4	4	28	0	5	5	4	64	49	3	116	0.29	5	5	5	6
2												4	4	2	2	1	1	2	1	2	1	4	2	4	4	4	4	4	4	5	4	33	4	4	4	28	0	4	4	4	86	61	5	152	2.98	4	4	4	4
2												3	3	1	1	1	1	2	1	1	1	3	2	4	4	5	4	5	4	5	4	35	4	5	4	27	0	5	4	3	86	33	2	121	0.19	5	6	3	4
2												4	4	2	1	1	1	2	1	1	1	2	2	5	5	5	5	5	5	5	5	40	5	5	5	33	0	5	4	5	86	34	3	123	0.84	4	4	5	4
2												4	4	2	2	1	1	1	1	2	1	3	2	4	4	5	4	4	5	5	5	36	5	5	5	32	0	4	5	4	77	19	4	100	0.53	5	3	3	3
2												3	3	1	1	1	1	1	1	1	1	2	2	5	5	5	5	4	5	4	4	37	4	4	3	26	0	4	4	4	95	43	5	143	2.81	5	5	4	4
2												3	3	2	2	1	1	1	1	1	1	4	2	4	4	4	4	4	4	4	4	32	4	4	4	28	0	4	4	4	86	34	2	122	0.22	5	5	4	4
2												3	4	1	1	1	1	1	1	1	1	1	2	4	4	4	3	4	3	4	4	30	3	3	3	24	0	4	4	4	86	85	6	177	4.41	4	4	4	4
2												3	3	1	1	1	1	1	1	1	1	2	2	4	4	5	2	4	4	4	4	31	3	4	3	25	0	4	4	4	86	34	5	125	2.08	3	5	4	3
2												3	3	2	2	2	2	1	1	1	1	6	2	4	4	4	4	4	4	4	3	31	3	4	4	24	0	3	4	3	91	39	4	134	1.87	3	3	3	3
2												3	4	1	2	1	1	2	1	2	1	4	2	4	4	5	3	3	5	3	4	31	4	4	3	24	0	4	4	3	86	28	2	116	0.02	5	6	2	2
2												3	4	2	1	1	1	2	2	2	1	5	2	3	4	4	4	4	4	4	4	31	4	4	4	26	0	3	4	3	91	66	6	163	4.01	5	4	4	3
2												4	4	2	1	1	1	2	1	1	1	2	2	3	4	4	3	5	4	5	3	31	4	4	3	24	0	3	4	3	77	25	3	105	0.11	6	5	3	2
2												3	4	2	1	1	1	2	1	1	1	3	2	4	4	3	4	4	4	5	3	31	4	4	4	27	0	4	4	4	80	28	6	114	2.21	5	5	4	3
2												2	3	1	2	1	1	1	1	1	1	4	2	4	3	4	4	4	4	4	4	31	4	4	4	30	0	5	5	3	86	71	5	162	3.32	3	1	1	1
2												4	4	2	1	1	1	1	1	2	1	2	2	3	3	3	3	4	4	5	4	29	4	3	4	25	0	3	3	4	91	90	5	186	4.19	5	4	4	3
2												3	4	1	1	1	1	1	1	1	1	1	2	2	2	3	3	3	3	5	3	24	3	4	3	25	0	3	4	4	91	66	6	163	4.01	4	5	4	3
2												3	3	2	2	1	1	1	1	1	1	4	2	4	4	4	5	5	5	5	3	35	4	4	3	22	0	3	3	2	86	34	4	124	1.46	5	2	1	2
2												3	3	2	1	1	1	2	2	2	1	6	2	4	4	4	4	4	4	5	4	33	3	4	4	21	0	3	3	3	95	70	4	169	3.1	5	5	4	2
2												4	4	2	2	2	1	1	1	1	1	3	2	4	4	4	4	4	4	4	4	32	3	3	3	23	0	4	4	3	86	85	5	176	3.79	4	3	3	3
2												3	3	2	2	1	1	2	1	2	1	6	2	4	4	4	4	4	4	4	4	32	4	3	3	21	0	4	3	3	86	75	7	168	4.69	4	4	2	2
2												3	3	2	2	2	1	2	2	2	1	8	2	5	5	5	4	5	5	4	4	37	3	4	4	22	0	3	3	3	71	70	3	144	1.33	6	5	4	4
2												4	4	2	2	2	2	2	1	2	1	6	2	3	4	4	5	5	5	5	4	35	3	4	4	21	0	4	3	2	91	43	4	138	2	3	4	3	3
2												3	3	1	1	1	1	2	2	1	1	4	2	4	4	4	4	4	4	4	4	32	2	4	3	21	0	3	3	3	86	61	4	151	2.37	5	5	3	3
2												3	3	2	1	1	1	1	1	1	1	3	2	5	4	3	4	5	4	4	3	32	3	4	4	21	0	3	3	3	71	70	3	144	1.33	4	4	4	1
2												2	4	1	1	1	1	1	1	1	1	2	2	5	5	5	5	5	5	5	5	40	2	5	4	23	0	4	4	3	91	71	5	167	3.56	6	6	6	4
2												4	4	2	2	2	1	2	1	1	1	4	2	4	5	5	4	4	4	5	3	34	3	5	3	21	0	3	3	2	86	33	4	123	1.43	3	3	3	3
2												4	4	1	2	2	1	2	1	1	1	3	2	4	4	5	4	4	4	5	3	33	4	4	4	21	0	3	3	2	80	74	6	160	3.75	5	4	2	2
2												4	4	2	2	1	1	1	1	1	1	2	2	4	4	5	5	5	5	5	3	36	3	4	2	17	0	2	3	2	80	55	4	139	1.88	5	4	4	4
2												4	4	2	2	2	1	2	1	1	1	4	2	5	4	4	4	4	4	4	4	33	3	4	3	23	0	4	4	3	86	62	4	152	2.4	4	5	3	3
2												3	4	1	2	1	1	2	1	1	1	3	2	5	5	4	3	4	4	5	5	35	3	3	4	23	0	3	4	3	95	43	6	144	3.43	4	4	3	2
2												3	4	1	1	1	1	2	1	2	1	3	2	4	4	4	4	4	4	4	4	32	3	4	4	22	0	3	4	2	91	39	3	133	1.25	4	4	3	3
2												4	4	4	2	1	1	1	1	1	1	4	2	5	5	5	4	5	5	5	3	37	4	4	4	22	0	3	4	2	86	61	6	153	3.6	5	3	3	3
2												4	4	2	2	1	1	2	1	1	1	3	2	4	4	4	5	5	5	5	4	36	3	4	4	23	0	4	3	3	86	28	5	119	1.88	4	5	4	2
2												3	4	4	2	1	1	1	1	1	1	5	2	4	4	4	5	5	5	5	3	35	3	4	3	20	0	3	3	2	80	27	3	110	0.32	5	5	2	1
2												3	4	2	2	2	2	2	1	2	1	7	2	4	4	4	5	5	5	5	4	36	2	4	4	23	0	4	4	3	86	61	4	151	2.37	5	5	2	1
2												4	4	2	2	1	1	2	1	2	1	4	2	3	5	4	3	4	5	4	3	31	3	4	3	17	0	2	3	1	80	60	8	148	4.52	5	4	3	2
2												3	4	2	1	1	1	2	1	2	1	4	2	4	4	4	4	4	4	4	3	31	2	4	4	18	0	2	2	2	86	71	5	162	3.32	5	5	2	2
2												3	3	2	2	2	1	2	2	2	1	8	2	3	3	2	4	4	4	4	3	27	3	3	2	18	0	2	3	2	86	34	6	126	2.7	3	5	3	2
2												3	3	2	2	1	1	3	2	2	1	8	2	4	4	4	3	3	2	3	3	26	4	3	4	22	0	2	4	3	86	61	2	149	1.13	4	4	2	2
2												4	4	2	2	1	1	2	1	1	1	3	2	2	4	4	4	4	4	4	3	29	3	4	3	21	0	3	3	3	95	15	3	113	0.64	4	4	4	4
2												3	3	2	2	2	1	2	2	2	1	8	2	3	3	4	3	3	3	4	4	27	3	3	3	20	0	3	3	3	77	24	3	104	0.08	3	3	2	2
2												3	4	2	1	1	1	1	1	1	1	2	2	2	4	3	4	4	5	4	4	30	3	4	2	18	0	3	3	2	91	38	4	133	1.83	4	5	3	2
2												3	4	1	1	1	1	1	1	1	1	1	2	4	4	3	2	5	5	5	3	31	2	3	4	17	0	2	2	2	71	19	4	94	0.24	4	3	2	2
2												3	3	2	3	1	1	3	1	1	1	7	2	1	4	2	3	3	3	4	2	22	1	4	2	16	0	3	3	2	86	34	5	125	2.08	3	4	4	4
2												3	3	2	2	1	1	1	1	2	1	5	2	3	4	3	4	4	4	4	4	30	4	4	4	23	0	3	3	3	91	27	2	120	0.23	4	4	4	4
2												4	4	2	2	1	1	2	1	1	1	3	2	2	3	5	2	4	5	5	3	29	4	4	2	20	0	3	3	2	80	79	4	163	2.68	5	5	4	3
2												1	1	1	1	1	1	2	2	1	1	8	2	2	4	4	2	2	2	3	2	21	3	4	3	21	0	2	4	3	71	19	4	94	0.24	3	3	3	3
2												2	4	2	3	2	1	2	2	1	1	8	2	2	3	3	4	4	4	4	3	27	3	4	4	23	0	3	4	3	86	33	3	122	0.81	4	3	3	3
2												3	4	2	2	1	2	2	2	2	1	7	2	3	4	4	3	4	4	4	4	30	3	4	3	23	0	4	4	3	86	71	4	161	2.7	4	4	3	3
2												4	4	3	1	1	1	2	2	2	1	5	2	4	4	4	3	4	4	4	4	31	3	3	4	23	0	4	4	3	86	85	2	173	1.93	5	5	4	3
2												3	3	3	1	1	1	1	1	1	1	4	2	3	4	3	3	3	3	3	3	25	3	3	3	18	0	3	3	2	86	61	3	150	1.75	3	5	3	3
2												3	3	2	3	2	1	2	1	1	1	7	2	4	4	4	3	3	3	4	3	28	5	4	5	23	0	2	3	2	95	70	4	169	3.1	5	3	2	2
2												3	3	2	2	2	1	2	2	2	1	8	2	4	4	4	3	3	4	4	3	29	3	3	3	20	0	3	3	3	71	70	3	144	1.33	4	4	4	3
2												3	3	2	2	1	1	1	1	2	1	5	2	4	4	4	4	4	4	4	4	32	4	4	4	27	0	4	4	3	64	40	3	107	-0.01	5	5	3	3
2												4	4	1	1	1	1	1	1	1	1	0	2	5	5	5	5	5	5	5	5	40	5	5	5	35	0	5	5	5	1	0	1	2	-5.6	2	2	2	3
2												3	4	2	2	2	2	1	1	2	1	6	2	5	4	5	5	5	5	5	5	39	4	4	3	29	0	5	5	5	64	12	2	78	-1.57	5	4	3	3
2												2	4	2	3	1	1	2	2	2	1	8	2	3	5	4	5	5	5	5	5	37	5	5	4	27	0	3	4	5	64	11	2	77	-1.6	6	4	1	1
2												4	4	1	2	1	1	2	1	2	1	3	2	5	5	5	5	5	5	4	3	37	5	5	5	35	0	5	5	5	71	0	1	72	-2.25	5	5	4	5
2												4	4	4	2	1	1	2	1	1	1	5	2	4	4	4	4	4	4	5	4	33	4	4	4	28	0	4	4	4	64	12	3	79	-0.95	5	4	3	2
2												3	3	2	2	1	1	1	1	1	1	4	2	4	4	5	5	5	5	4	4	36	4	5	5	29	0	4	4	4	52	0	1	53	-3.16	6	6	5	4
2												3	3	1	1	1	1	1	1	1	1	2	2	4	4	3	5	5	5	5	4	35	4	4	4	24	0	4	4	3	77	19	2	98	-0.71	5	4	3	4
2												3	4	2	1	1	1	2	1	2	1	4	2	5	5	5	5	5	5	5	4	39	5	4	5	27	0	3	4	3	71	19	3	93	-0.38	5	6	4	4
2												3	3	1	2	1	1	1	1	1	1	3	2	4	4	4	4	4	4	4	4	32	3	4	4	24	0	3	3	3	71	7	2	80	-1.4	5	4	3	2
2												3	3	3	2	2	1	1	1	1	1	6	2	4	4	4	4	4	4	4	4	32	4	4	4	28	0	4	4	4	64	0	1	65	-2.59	4	4	4	4
2												3	3	2	2	2	1	1	1	2	1	6	2	4	4	4	4	4	4	4	4	32	4	4	4	28	0	4	4	4	86	0	1	87	-1.53	5	4	4	4
2												4	4	2	1	1	1	1	1	1	1	1	2	4	4	4	4	4	5	5	5	35	5	5	5	34	0	4	5	5	95	0	1	96	-1.1	4	4	4	4
2												3	4	1	1	1	1	1	1	1	1	1	2	4	4	5	5	5	5	5	5	38	4	4	4	31	0	5	5	4	53	0	1	54	-3.11	5	5	4	1
2												4	4	2	2	1	1	1	1	2	1	3	2	4	4	4	5	5	5	5	4	36	4	4	4	28	0	4	4	4	1	0	1	2	-5.6	5	5	5	4
2												3	3	2	2	1	2	1	1	1	1	5	2	4	5	5	5	5	5	5	4	38	4	4	4	26	0	3	4	4	1	0	1	2	-5.6	5	6	4	3
2												4	4	2	1	1	2	1	1	1	1	2	2	4	4	4	4	5	5	5	4	35	3	4	4	26	0	4	4	4	58	0	1	59	-2.87	4	4	4	3
2												3	3	2	1	1	1	2	1	2	1	5	2	5	5	5	5	5	5	5	5	40	4	5	4	27	0	4	4	3	52	37	2	91	-1.3	5	5	5	1
2												3	3	2	2	2	1	2	1	2	1	7	2	4	4	4	4	4	4	4	4	32	4	4	4	28	0	4	4	4	53	52	2	107	-0.75	5	5	4	4
2												3	4	1	1	1	1	1	1	2	1	2	2	3	4	4	4	5	5	5	4	34	4	4	3	26	0	4	5	4	53	1	2	56	-2.46	5	4	4	4
2												3	4	2	2	1	1	1	1	1	1	3	2	4	4	4	3	4	4	4	4	31	3	4	4	25	0	4	4	3	77	19	3	99	-0.09	5	4	3	3
2												2	3	2	2	1	1	1	1	3	1	7	2	3	3	4	3	3	3	4	4	27	3	3	3	24	0	4	4	4	53	0	1	54	-3.11	5	5	5	4
2												4	4	1	2	2	1	1	1	1	1	2	2	3	4	4	3	3	3	4	4	28	4	4	3	24	0	3	4	3	52	0	1	53	-3.16	5	4	4	3
2												3	3	2	2	2	2	1	2	2	1	8	2	4	4	3	4	3	4	4	4	30	4	4	3	27	0	4	4	4	58	0	1	59	-2.87	4	4	4	4
2												4	4	1	1	1	1	1	1	1	1	0	2	2	4	4	4	3	3	5	3	28	4	4	4	26	0	4	4	3	86	0	1	87	-1.53	4	4	2	1
2												3	4	2	2	2	1	2	1	2	1	6	2	4	4	3	4	4	4	4	4	31	4	4	4	26	0	4	3	3	86	9	2	97	-0.61	3	4	4	4
2												4	3	3	1	1	1	1	1	1	1	3	2	4	3	5	3	3	3	4	4	29	4	4	5	27	0	4	4	3	71	19	3	93	-0.38	6	4	2	2
2												3	3	2	1	1	1	2	1	2	1	5	2	4	4	4	4	4	5	5	4	34	3	4	4	22	0	2	3	3	53	1	2	56	-2.46	5	4	2	4
2												4	4	1	1	1	1	1	1	1	1	0	2	3	4	3	5	4	5	5	4	33	3	4	4	23	0	3	3	2	58	0	1	59	-2.87	4	5	3	2
2												2	4	1	1	1	1	1	1	1	1	2	2	5	4	4	5	5	3	5	3	34	3	4	3	23	0	3	4	3	86	0	1	87	-1.53	4	4	2	1
2												3	3	2	2	1	1	2	1	1	1	5	2	3	3	5	5	5	5	5	5	36	3	3	3	18	0	3	3	2	53	0	1	54	-3.11	6	6	6	1
2												4	4	2	1	1	1	2	2	2	1	4	2	3	5	5	5	5	5	5	2	35	3	5	3	20	0	2	3	3	64	11	3	78	-0.98	5	4	4	3
2												4	4	2	2	1	1	1	1	1	1	2	2	4	4	4	5	4	4	5	4	34	3	4	3	22	0	3	2	4	58	34	3	95	-0.5	5	5	5	5
2												4	4	3	1	1	2	1	1	2	1	4	2	3	4	5	5	5	5	5	5	37	3	4	3	23	0	3	5	3	52	0	1	53	-3.16	4	6	3	2
2												4	4	2	2	2	1	1	2	2	1	5	2	3	4	3	5	4	4	5	5	33	2	4	4	22	0	4	4	2	71	0	1	72	-2.25	5	5	4	4
2												3	3	1	1	1	1	2	1	2	1	4	2	4	4	4	4	5	4	4	3	32	3	3	4	19	0	3	3	2	77	0	1	78	-1.96	4	4	3	2
2												4	4	1	2	1	1	1	1	1	1	1	2	4	4	4	5	5	5	4	3	34	2	4	4	21	0	3	4	3	86	0	1	87	-1.53	4	5	2	3
2												4	4	1	2	1	1	1	1	1	1	1	2	4	4	4	4	4	4	4	3	31	4	4	4	23	0	3	3	3	86	9	2	97	-0.61	4	5	4	4
2												4	4	2	2	1	1	1	1	2	1	3	2	3	1	4	4	1	3	1	3	20	2	3	3	21	0	4	3	3	77	0	1	78	-1.96	4	4	3	5
2												3	4	2	2	1	1	1	1	1	1	3	2	4	4	3	3	3	3	3	3	26	3	3	3	20	0	3	3	2	71	0	1	72	-2.25	1	2	4	4
2												3	3	3	1	1	1	1	1	1	1	4	2	4	4	3	3	3	3	4	2	26	3	4	4	23	0	3	3	3	86	9	2	97	-0.61	5	5	3	1
2												2	4	2	2	2	1	2	2	2	1	8	2	4	4	4	3	4	4	4	4	31	3	4	3	22	0	4	3	3	52	0	1	53	-3.16	4	5	3	4
2												3	3	2	2	2	1	2	1	1	1	6	2	4	4	4	4	4	3	4	4	31	1	4	5	22	0	2	3	3	53	1	2	56	-2.46	5	4	4	2
2												3	3	2	1	1	1	2	1	1	1	4	2	3	4	4	4	4	4	4	3	30	3	3	4	21	0	3	3	3	80	0	1	81	-1.82	5	6	4	4
2												2	3	2	2	2	1	2	1	2	1	8	2	3	4	4	4	4	4	4	4	31	2	3	3	19	0	3	3	3	71	7	2	80	-1.4	3	4	3	3
2												3	3	2	2	1	1	2	1	2	1	6	2	1	1	1	1	1	1	1	1	8	4	1	1	10	0	1	1	1	86	0	1	87	-1.53	3	3	3	3
2												3	3	2	1	1	1	2	1	1	1	4	2	5	5	4	4	4	4	5	5	36	4	4	4	28	0	4	4	4	91	27	2	120	0.23	3	3	3	3
2												4	4	1	1	1	1	1	1	1	1	0	2	3	4	4	4	4	4	5	4	32	4	4	4	25	0	4	4	4	80	79	8	167	5.16	6	6	2	2
2												3	3	2	1	1	2	1	1	1	1	4	2	4	4	4	4	4	4	4	4	32	3	4	4	25	0	3	4	4	95	15	2	112	0.02	4	3	3	4
2												4	4	1	1	1	1	1	1	1	1	0	2	5	4	4	5	5	5	5	5	38	4	5	4	32	0	5	5	5	95	31	4	130	1.79	4	2	2	1
2												3	4	1	1	1	1	1	1	1	1	1	2	4	3	4	4	4	4	5	5	33	3	3	3	24	0	4	4	3	86	80	4	170	3	1	2	2	2
2												4	4	3	2	1	1	1	1	1	1	3	2	4	4	3	4	5	5	5	5	35	5	4	4	33	0	5	5	5	86	71	4	161	2.7	4	5	4	1
2												3	4	2	2	2	1	2	1	1	1	5	2	4	5	3	4	4	5	4	4	33	4	4	3	28	0	4	4	4	91	80	4	175	3.24	4	1	1	1
2												4	4	1	1	1	1	2	1	1	1	1	2	5	5	5	5	5	3	5	5	38	5	5	5	35	0	5	5	5	86	34	4	124	1.46	4	4	4	1
2												3	3	2	2	2	1	2	2	2	1	8	2	4	4	4	4	4	4	4	4	32	3	4	4	25	0	4	4	3	86	61	2	149	1.13	4	3	3	2
2												3	4	2	1	1	2	1	1	1	1	3	2	5	4	3	3	3	4	5	5	32	4	5	4	31	0	5	5	4	86	61	3	150	1.75	2	2	2	2
2												3	4	1	1	1	1	2	1	2	1	3	2	4	4	4	4	4	4	4	4	32	4	4	4	28	0	4	4	4	86	61	4	151	2.37	3	3	3	3
2												4	4	1	1	1	1	1	1	1	1	0	2	5	5	4	4	4	4	5	4	35	4	4	4	26	0	4	4	3	86	75	4	165	2.83	4	3	3	3
2												4	4	1	1	1	1	1	1	1	1	0	2	5	5	5	5	5	5	5	5	40	5	5	5	35	0	5	5	5	91	33	2	126	0.43	2	2	2	2
2												3	2	2	2	1	2	2	2	1	1	8	2	4	4	4	4	5	5	5	4	35	4	4	4	26	0	3	4	3	86	75	5	166	3.45	5	5	5	5
2												2	4	2	1	1	1	1	1	1	1	3	2	1	3	4	3	5	5	5	5	31	3	2	5	24	0	4	4	4	86	61	3	150	1.75	1	2	2	1
2												1	1	1	1	1	1	1	1	1	1	6	2	4	4	3	3	3	3	5	4	29	4	3	3	24	0	4	4	3	80	28	5	113	1.59	2	4	3	2
2												3	3	1	2	2	1	2	2	2	1	7	2	4	4	3	4	4	3	4	4	30	4	4	4	26	0	4	4	4	86	80	5	171	3.62	3	2	2	1
2												3	3	2	2	1	2	2	2	2	1	8	2	3	4	4	5	5	5	5	5	36	3	3	3	23	0	4	3	4	71	60	3	134	0.99	4	1	2	2
2												3	4	1	2	2	1	1	1	1	1	3	2	4	4	4	4	5	4	4	3	32	1	1	1	13	0	3	3	2	71	19	4	94	0.24	3	3	3	2
2												4	3	2	2	1	1	2	1	2	1	5	2	3	4	4	5	4	4	5	4	33	3	4	3	17	0	2	2	2	86	85	4	175	3.17	5	4	2	2
2												3	3	1	2	2	1	2	1	2	1	6	2	4	5	5	5	5	5	4	4	37	3	4	4	22	0	3	3	3	71	65	7	143	3.64	5	3	1	1
2												4	4	2	1	1	1	1	1	1	1	1	2	4	4	3	5	5	5	5	4	35	3	4	4	22	0	3	4	2	77	25	4	106	0.73	4	3	2	2
2												3	4	1	1	1	1	2	1	3	1	4	2	5	5	5	5	5	5	5	5	40	2	4	3	21	0	2	3	3	77	71	3	151	1.65	3	4	2	2
2												4	4	1	1	1	1	1	1	1	1	0	2	4	4	4	4	4	4	5	4	33	3	4	4	23	0	3	4	3	86	33	4	123	1.43	5	4	4	1
2												3	3	2	3	1	2	2	1	2	1	8	2	4	4	4	5	4	4	4	3	32	3	3	2	19	0	3	3	3	86	80	2	168	1.76	4	1	1	1
2												3	3	2	2	2	2	2	1	2	1	8	2	4	4	4	4	4	4	4	4	32	3	3	3	21	0	3	3	3	77	76	4	157	2.44	4	2	2	1
2												2	4	2	2	2	1	2	2	2	1	8	2	4	4	3	5	5	5	5	3	34	3	4	3	20	0	3	3	3	86	22	3	111	0.44	4	3	2	2
2												4	4	2	1	1	1	2	1	2	1	3	2	4	4	4	4	4	4	4	4	32	3	4	3	23	0	3	4	3	86	22	3	111	0.44	4	4	4	3
2												3	4	2	1	1	1	2	1	2	1	4	2	5	4	5	5	5	5	5	4	38	4	4	4	23	0	3	4	2	86	62	3	151	1.78	4	4	3	2
2												3	3	2	1	1	2	2	2	1	1	6	2	3	3	3	3	3	3	4	3	25	3	3	3	20	0	3	3	3	86	71	4	161	2.7	2	4	2	1
2												3	3	2	2	2	2	2	1	1	1	7	2	4	3	3	3	3	3	4	4	27	3	3	3	22	0	4	4	3	86	85	4	175	3.17	5	1	1	1
2												3	3	2	1	1	1	1	1	1	1	3	2	3	3	3	3	3	3	3	3	24	3	3	3	19	0	3	3	3	95	71	6	172	4.37	4	4	4	4
2												3	3	2	2	1	2	2	2	2	1	8	2	3	3	3	3	3	3	3	3	24	3	3	3	19	0	3	3	3	77	62	6	145	3.21	4	1	1	1
2												3	4	2	2	2	1	2	2	2	1	7	2	4	4	3	4	3	3	4	4	29	3	4	4	22	0	3	3	3	86	85	4	175	3.17	5	4	1	1
2												4	4	2	1	2	1	2	1	1	1	3	2	3	4	4	4	4	4	4	3	30	3	3	2	21	0	4	4	2	91	66	3	160	2.15	2	2	2	2
2												3	3	2	2	2	1	2	2	2	1	8	2	4	3	4	3	4	4	4	4	30	3	4	3	22	0	3	3	3	95	9	3	107	0.44	4	4	2	2
2												3	3	2	2	2	1	2	1	2	1	7	2	5	3	3	2	2	2	4	3	24	3	3	3	18	0	2	2	2	77	62	2	141	0.73	5	4	4	2
2												3	3	1	2	1	1	2	2	2	1	6	2	4	4	3	3	4	3	4	2	27	3	3	3	17	0	3	3	1	86	61	3	150	1.75	4	1	1	1
2												3	3	2	2	1	1	3	1	3	1	8	2	4	4	3	3	3	1	4	3	25	3	3	3	20	0	3	3	2	86	34	4	124	1.46	3	3	3	1
2												2	4	2	1	1	1	1	1	2	1	4	2	3	3	4	4	4	4	4	3	29	2	3	3	16	0	2	2	2	86	33	5	124	2.05	5	3	1	1
2												3	4	2	1	1	2	1	1	2	1	4	2	4	4	3	4	4	4	4	4	31	3	3	2	22	0	4	5	2	71	60	6	137	2.85	5	5	2	2
2												3	4	2	2	2	1	2	2	2	1	7	2	4	3	4	4	4	4	4	3	30	3	4	4	23	0	4	3	3	71	56	4	131	1.48	4	2	2	2
2												2	3	2	1	1	2	2	2	2	1	8	2	3	3	4	3	4	4	4	4	29	3	3	3	20	0	4	3	2	86	33	2	121	0.19	2	2	1	1
2												3	3	2	2	2	1	2	1	1	1	6	2	3	4	4	3	4	3	3	3	27	3	3	3	19	0	3	3	2	86	61	2	149	1.13	3	3	3	3
2												2	2	1	1	1	1	1	1	1	1	4	2	4	4	4	2	2	2	4	4	26	2	2	3	13	0	2	2	1	86	80	3	169	2.38	2	2	1	1
2												3	4	2	2	2	1	2	1	1	1	5	2	4	3	2	4	4	4	4	3	28	3	3	3	19	0	2	3	3	77	71	2	150	1.03	2	4	3	3
2												2	4	2	2	2	1	2	1	2	1	7	2	3	4	4	3	3	3	4	4	28	1	3	3	16	0	2	3	2	86	85	2	173	1.93	2	2	2	2
2												3	3	2	2	2	1	2	1	1	1	6	2	4	4	3	4	4	4	4	3	30	3	4	3	21	0	3	3	3	95	94	5	194	4.52	4	4	4	4
2												3	3	2	2	1	2	1	1	1	1	5	2	4	4	4	4	3	4	4	3	30	4	4	4	20	0	2	2	1	86	80	3	169	2.38	3	3	3	2
2												2	1	2	1	1	1	1	1	1	1	6	2	4	4	4	4	4	5	5	5	35	4	5	5	31	0	5	5	2	64	11	2	77	-1.6	5	5	5	1
2												3	4	2	2	2	1	2	1	1	1	5	2	3	4	5	5	5	5	5	5	37	3	4	4	24	0	4	4	3	64	0	1	65	-2.59	4	4	4	3
2												3	4	1	1	1	1	2	1	1	1	2	2	4	4	4	4	5	5	5	3	34	4	4	5	26	0	3	4	3	53	0	1	54	-3.11	4	4	4	4
2												4	4	2	2	2	1	2	1	2	1	5	2	4	4	4	4	4	4	5	4	33	1	4	3	24	0	4	4	4	52	51	2	105	-0.83	4	3	3	1
2												4	4	1	1	1	1	2	1	1	1	1	2	4	4	4	4	5	5	5	4	35	4	4	4	26	0	3	4	3	64	0	1	65	-2.59	5	5	5	5
2												3	4	2	2	1	1	2	1	1	1	4	2	5	5	5	5	4	5	5	4	38	5	5	5	31	0	4	4	5	86	0	1	87	-1.53	4	3	2	1
2												4	3	2	2	1	1	2	1	1	1	4	2	3	4	4	5	5	4	5	5	35	5	4	4	27	0	4	4	3	64	0	1	65	-2.59	2	2	2	2
2												3	3	1	1	1	1	1	1	1	1	2	2	3	4	5	5	5	5	5	5	37	3	5	3	27	0	5	5	3	53	1	2	56	-2.46	5	4	1	1
2												3	3	2	2	1	1	2	1	1	1	5	2	4	4	4	4	5	5	4	5	35	3	3	3	25	0	4	4	4	53	0	1	54	-3.11	4	3	3	3
2												3	3	2	2	1	1	2	2	2	1	7	2	4	4	4	4	4	4	4	4	32	4	4	4	28	0	4	4	4	71	19	2	92	-1	2	2	2	1
2												3	4	2	2	1	1	1	1	2	1	4	2	5	4	4	4	5	3	5	4	34	4	4	3	25	0	4	4	3	64	11	2	77	-1.6	4	4	3	1
2												3	3	1	2	2	2	2	2	2	1	8	2	2	3	3	3	2	2	5	4	24	4	4	3	27	0	4	4	4	53	1	2	56	-2.46	2	3	2	2
2												3	3	2	2	2	1	1	1	1	1	5	2	3	4	4	4	4	4	4	4	31	3	4	4	27	0	4	4	4	71	13	3	87	-0.58	5	4	2	1
2												2	3	2	2	2	1	2	1	2	1	8	2	2	4	4	4	4	3	3	2	26	4	4	4	24	0	3	4	2	58	6	2	66	-2.05	3	4	3	2
2												3	3	3	2	1	2	2	1	1	1	7	2	3	4	4	3	3	2	5	5	29	3	4	4	25	0	5	4	3	53	52	2	107	-0.75	4	2	2	2
2												3	3	1	2	1	1	2	2	2	1	6	2	3	3	5	4	4	3	2	4	28	4	4	4	28	0	4	4	4	25	0	1	26	-4.45	1	1	1	1
2												3	4	2	2	2	2	2	2	2	1	8	2	4	4	4	4	4	5	5	3	33	3	4	3	20	0	2	3	3	71	0	1	72	-2.25	4	3	1	1
2												3	4	2	2	2	1	1	1	2	1	5	2	4	4	5	5	5	5	4	4	36	3	3	3	20	0	4	3	2	52	27	2	81	-1.64	5	5	2	2
2												3	4	2	1	1	1	1	1	1	1	2	2	5	5	3	4	5	5	4	4	35	4	3	4	22	0	3	4	2	1	0	1	2	-5.6	6	6	1	1
2												3	3	3	1	1	1	2	1	1	1	5	2	4	4	4	4	4	4	4	4	32	4	4	4	23	0	3	3	3	71	13	3	87	-0.58	5	4	2	1
2												3	3	2	2	1	2	2	1	1	1	6	2	4	4	5	5	5	5	5	4	37	3	4	3	22	0	4	4	2	53	0	1	54	-3.11	3	2	2	1
2												2	3	1	1	1	1	1	1	1	1	3	2	4	4	4	4	5	5	4	4	34	2	3	3	18	0	3	3	2	91	5	2	98	-0.51	4	4	1	1
2												4	4	2	2	2	1	2	1	2	1	5	2	4	4	5	5	5	5	5	3	36	3	4	4	20	0	3	3	2	52	0	1	53	-3.16	3	3	3	3
2												2	2	1	2	1	1	1	1	2	1	6	2	4	4	5	4	4	4	4	4	33	3	3	3	23	0	4	4	3	53	0	1	54	-3.11	2	2	2	2
2												3	4	1	1	1	1	1	1	1	1	1	2	5	5	5	5	5	4	4	4	37	3	3	3	21	0	4	4	2	77	0	1	78	-1.96	2	1	2	1
2												4	4	4	4	2	2	1	1	1	1	8	2	5	5	5	5	5	5	5	5	40	2	3	3	18	0	3	3	2	52	0	1	53	-3.16	3	4	2	2
2												2	3	1	2	1	1	1	1	2	1	5	2	3	4	4	4	4	5	5	5	34	2	3	3	18	0	3	3	2	86	0	2	88	-0.92	3	4	4	2
2												3	3	2	2	2	2	1	2	2	1	8	2	4	4	4	5	4	4	4	3	32	3	4	3	19	0	3	3	2	86	0	1	87	-1.53	5	5	2	2
2												2	4	2	2	1	1	2	2	2	1	7	2	4	2	2	2	3	3	4	3	23	3	3	4	20	0	3	3	2	53	1	2	56	-2.46	4	4	2	2
2												1	1	1	1	1	1	1	1	1	1	6	2	2	4	4	4	4	4	4	4	30	2	4	4	22	0	2	4	4	58	57	2	117	-0.35	3	3	3	1
2												2	3	2	2	2	1	1	1	1	1	6	2	4	4	4	3	3	3	4	3	28	2	4	3	19	0	3	3	2	64	0	1	65	-2.59	4	5	3	1
2												4	4	2	2	2	1	2	2	2	1	6	2	3	4	4	4	4	4	4	3	30	4	4	4	23	0	3	3	3	71	0	1	72	-2.25	4	4	4	4
2												3	3	2	2	1	1	1	1	1	1	4	2	4	3	4	3	3	3	4	4	28	2	3	3	18	0	3	3	2	86	0	1	87	-1.53	3	2	2	1
2												3	4	2	1	1	2	2	1	1	1	4	2	4	4	3	3	4	3	4	3	28	3	3	4	20	0	2	3	3	64	6	2	72	-1.77	5	4	3	2
2												3	3	1	1	1	2	2	1	2	1	5	2	3	3	4	2	2	2	4	3	23	2	3	3	17	0	2	4	2	71	0	1	72	-2.25	4	3	2	2
2												3	3	2	1	1	1	2	2	2	1	6	2	3	4	2	3	3	3	4	3	25	2	2	2	15	0	3	3	2	91	20	2	113	-0.01	3	4	4	3
2												2	3	2	2	2	2	2	1	1	1	8	2	3	3	5	2	3	2	4	4	26	5	4	4	20	0	2	2	2	86	0	1	87	-1.53	2	2	1	1
2												2	4	2	2	2	1	2	1	2	1	7	2	4	4	4	3	5	3	4	2	29	3	3	4	16	0	1	2	2	86	15	2	103	-0.41	6	2	1	1
2												3	3	2	2	1	1	2	2	2	1	7	2	3	3	4	4	4	3	4	3	28	3	4	4	23	0	3	3	3	11	0	1	12	-5.12	4	4	4	3
2												3	4	2	2	1	1	1	1	1	1	3	2	2	3	2	2	2	1	3	3	18	3	2	2	17	0	2	3	2	53	38	2	93	-1.22	4	2	1	1
2												3	3	2	2	2	1	1	1	1	1	5	2	4	4	3	3	3	4	4	4	29	4	4	4	22	0	3	3	2	71	7	2	80	-1.4	4	4	4	3
2												4	4	2	2	2	2	2	2	1	1	6	2	4	3	4	3	3	3	4	4	28	3	4	4	21	0	3	3	2	53	0	1	54	-3.11	4	2	1	1
2												3	3	2	2	1	1	2	1	1	1	5	2	3	4	4	3	3	3	4	4	28	3	3	3	20	0	3	4	2	86	0	1	87	-1.53	2	2	1	1
2												3	3	2	2	2	1	2	1	2	1	7	2	3	4	4	3	3	3	4	4	28	3	3	3	20	0	3	3	3	52	0	1	53	-3.16	5	4	3	2
2												3	3	1	2	2	1	2	1	1	1	5	2	3	3	3	3	3	3	4	4	26	3	3	2	20	0	4	4	2	71	0	1	72	-2.25	3	1	1	1
2												2	4	2	1	2	2	2	2	2	1	8	2	3	4	4	4	4	4	4	3	30	3	3	3	19	0	2	3	2	52	0	1	53	-3.16	4	4	1	1
2												2	2	1	1	1	1	2	1	1	1	5	2	2	3	3	3	3	3	4	3	24	3	3	3	21	0	3	3	3	86	22	2	110	-0.18	4	2	2	1
2												3	3	2	2	1	1	2	1	2	1	6	2	2	3	3	3	4	3	4	3	25	2	2	2	13	0	2	2	2	58	0	1	59	-2.87	3	3	2	1
2												3	3	2	1	1	1	2	2	2	1	6	2	4	4	4	4	4	4	4	3	31	4	4	4	22	0	3	3	2	52	0	1	53	-3.16	5	4	3	3
2												4	4	2	1	1	1	2	1	1	1	2	2	4	4	4	4	4	4	3	3	30	1	4	3	16	0	2	3	2	15	0	1	16	-4.93	5	3	1	1
2												3	3	3	1	1	1	1	1	1	1	4	2	4	4	4	4	4	4	4	3	31	3	4	4	23	0	3	3	3	77	25	2	104	-0.51	4	3	3	3
2												2	3	2	2	2	1	2	1	2	1	8	2	4	3	3	3	4	4	4	4	29	3	3	3	20	0	3	3	3	64	0	1	65	-2.59	2	2	1	2
2												3	3	1	2	1	1	1	1	2	1	4	2	3	4	4	3	4	2	4	3	27	3	4	2	21	0	4	4	2	15	0	1	16	-4.93	4	3	1	1
2												3	3	2	1	1	1	1	1	1	1	3	2	2	4	2	2	3	3	4	3	23	3	3	3	17	0	2	3	2	71	19	2	92	-1	4	1	1	2
3								3	1	1	2	3	3	2	2	2	1	3	2	2	1	9	1	4	4	4	4	4	4	3	4	31	3	4	3	24	0	4	4	3	95	24	3	122	0.94	4	4	4	4
3								3	2	1	3	2	2	2	2	2	1	2	2	2	1	10	1	3	4	4	4	4	4	4	4	31	4	4	4	25	0	4	4	3	86	71	4	161	2.7	5	5	5	5
3								3	2	2	3	1	1	1	1	1	1	2	1	3	1	9	1	3	3	4	4	4	4	4	4	30	4	4	4	26	0	4	4	3	86	34	4	124	1.46	4	4	4	4
3								1	1	1	3	2	3	3	3	2	2	2	2	2	2	13	1	4	4	3	4	4	4	3	4	30	4	4	4	26	0	3	4	3	71	70	3	144	1.33	4	4	4	4
3								3	1	1	2	3	4	4	3	2	1	2	2	2	2	11	1	3	4	4	5	5	5	5	4	35	4	4	3	22	0	4	4	2	86	62	7	155	4.25	3	4	4	4
3								1	1	1	1	1	1	1	2	1	1	2	1	2	1	9	1	3	4	4	4	5	5	5	4	34	3	3	2	19	0	4	4	2	91	67	7	165	4.66	5	6	2	6
3								1	1	2	1	2	2	3	3	2	2	1	3	2	1	13	1	4	4	4	4	3	4	4	3	30	3	4	4	21	0	3	3	2	86	80	2	168	1.76	5	3	2	2
3								2	1	1	1	2	3	2	2	2	1	2	2	2	1	9	1	3	2	4	3	3	3	3	3	24	3	3	3	19	0	3	3	2	71	46	3	120	0.53	4	4	4	4
3								1	1	1	2	1	1	2	2	1	1	1	1	2	1	9	1	4	4	4	4	4	4	4	4	32	4	4	4	27	0	4	4	4	95	0	1	96	-1.1	5	5	5	5
3								3	1	1	2	1	1	2	2	1	1	2	2	2	1	11	1	4	4	4	4	4	4	4	4	32	4	4	4	27	0	4	4	3	86	0	2	88	-0.92	3	5	5	5
3								1	1	1	2	3	3	2	2	2	2	2	2	2	1	9	1	4	5	5	5	5	5	5	5	39	4	5	5	33	0	5	5	5	15	0	1	16	-4.93	6	6	6	4
3								1	1	1	3	3	3	2	3	2	2	2	3	2	1	11	1	4	4	4	5	5	4	4	4	34	4	4	4	28	0	4	4	4	64	12	3	79	-0.95	5	5	4	2
3								1	1	1	2	2	2	2	3	2	1	2	1	2	1	10	1	4	4	4	4	4	4	4	4	32	4	4	4	28	0	4	4	4	71	0	1	72	-2.25	5	5	5	5
3								3	2	3	3	1	2	1	3	2	2	2	2	2	1	12	1	4	4	3	3	3	4	5	5	31	3	5	5	29	0	5	5	4	64	0	1	65	-2.59	4	4	4	1
3								1	1	1	1	2	2	2	2	2	2	2	2	2	1	11	1	4	4	4	4	4	4	3	3	30	3	3	3	21	0	3	3	3	64	0	1	65	-2.59	5	5	5	4
3								3	1	1	2	3	3	2	3	2	2	2	2	1	1	9	1	3	3	4	3	3	3	4	3	26	2	2	2	17	0	4	3	2	86	22	2	110	-0.18	4	4	4	4
3								3	1	2	3	3	3	4	2	2	3	3	3	2	1	14	1	4	3	5	5	5	3	5	4	34	4	4	5	21	0	2	2	2	86	61	3	150	1.75	1	1	1	1
3								1	1	2	1	3	3	2	2	2	2	2	2	2	1	9	1	4	4	3	5	5	4	4	3	32	2	4	3	18	0	3	2	2	86	61	2	149	1.13	4	3	2	2
3								1	1	2	3	2	2	3	3	1	3	1	2	2	1	12	1	4	5	5	5	5	5	5	2	36	2	4	5	20	0	2	2	3	91	27	4	122	1.47	5	2	2	1
3								1	1	2	3	2	2	2	3	2	2	2	3	2	1	13	1	3	4	4	3	4	4	4	3	29	3	4	3	23	0	4	4	3	86	85	4	175	3.17	2	4	2	2
3								1	1	1	2	2	3	2	2	2	2	2	2	1	2	10	1	3	4	3	3	3	4	4	4	28	3	3	3	22	0	4	4	3	86	85	3	174	2.55	4	4	2	2
3								1	1	1	2	3	3	2	2	2	2	2	2	2	2	10	1	4	4	4	3	3	3	4	4	29	3	3	4	23	0	3	4	3	86	15	3	104	0.21	4	4	4	4
3								3	1	1	3	2	2	2	2	3	3	2	2	2	2	14	1	4	3	3	3	3	2	3	2	23	2	2	4	18	0	3	2	3	95	94	7	196	5.76	4	3	3	2
3								1	1	1	3	3	4	2	2	2	1	2	2	4	1	9	1	4	3	2	3	4	3	5	3	27	4	3	3	20	0	3	2	3	86	71	2	159	1.46	4	5	2	3
3								1	2	2	3	2	3	2	2	2	2	2	2	2	1	10	1	3	4	5	3	4	4	5	3	31	3	4	3	18	0	2	2	3	86	34	3	123	0.84	4	5	1	3
3								2	1	1	1	2	2	2	2	2	2	1	2	2	1	10	1	4	3	4	3	3	3	4	4	28	3	3	4	22	0	3	3	3	86	34	3	123	0.84	3	4	2	2
3								3	1	1	1	3	3	3	2	2	1	2	2	2	1	9	1	2	4	2	3	4	3	4	4	26	4	3	4	23	0	3	4	3	86	80	6	172	4.24	4	5	2	3
3								2	1	2	2	2	2	3	2	2	2	2	3	2	2	14	1	4	4	3	3	3	3	4	3	27	4	4	4	21	0	3	3	2	86	33	2	121	0.19	4	4	1	1
3								1	2	2	2	1	2	2	3	1	1	3	2	2	1	12	1	3	4	4	4	3	3	4	3	28	2	4	4	20	0	3	3	2	91	39	2	132	0.63	4	4	4	4
3								1	1	2	2	2	3	2	3	2	1	1	2	2	1	9	1	3	4	4	3	3	3	3	4	27	3	4	4	23	0	3	4	3	71	70	2	143	0.71	4	5	1	1
3								3	1	1	3	3	3	3	3	2	2	3	2	2	1	12	1	3	4	4	3	4	3	4	3	28	2	3	3	16	0	2	2	2	64	63	2	129	0.14	4	4	4	4
3								3	1	2	3	3	3	3	4	4	2	3	2	2	1	15	1	1	3	3	3	3	3	5	3	24	2	3	4	18	0	2	3	2	86	85	3	174	2.55	4	4	1	1
3								1	1	1	3	2	1	2	2	2	1	2	1	1	1	9	1	3	3	4	4	4	5	5	5	33	3	3	4	25	0	5	5	3	86	0	1	87	-1.53	3	4	2	2
3								1	1	1	2	3	2	2	2	2	2	2	2	2	1	10	1	4	4	4	4	4	4	4	4	32	3	4	4	24	0	4	4	3	86	0	2	88	-0.92	5	4	1	1
3								3	1	1	3	2	2	3	3	3	2	3	2	2	1	15	1	4	4	4	4	4	4	4	4	32	4	4	4	27	0	4	4	4	80	0	1	81	-1.82	4	4	3	2
3								1	1	1	2	2	2	3	4	4	3	2	3	4	1	20	1	3	4	3	4	3	3	4	3	27	3	4	3	26	0	4	5	4	15	0	1	16	-4.93	2	1	1	1
3								1	1	2	2	2	2	2	2	1	1	3	3	3	2	13	1	3	3	4	4	2	3	4	3	26	3	3	3	20	0	3	3	3	71	19	3	93	-0.38	2	2	1	1
3								1	1	2	3	2	3	3	2	1	1	3	2	3	1	11	1	4	4	4	3	3	3	4	3	28	4	3	3	21	0	3	4	2	86	9	2	97	-0.61	3	4	2	2
3								3	2	3	3	2	2	2	2	2	2	2	2	2	4	14	1	2	2	2	2	3	3	4	3	21	3	2	3	18	0	3	2	3	86	0	1	87	-1.53	3	4	2	4
3								3	1	1	3	2	3	2	2	2	2	3	2	2	1	11	1	4	4	4	4	4	4	4	3	31	3	4	3	20	0	3	4	2	77	0	1	78	-1.96	3	4	1	1
3								1	1	1	2	2	3	1	2	2	2	2	2	2	1	9	1	4	3	4	4	4	3	3	3	28	3	3	3	18	0	3	2	2	52	0	1	53	-3.16	4	4	3	4
3								1	2	2	3	2	3	2	2	2	2	2	2	2	1	10	1	3	3	3	3	3	3	3	3	24	3	3	3	19	0	3	3	2	77	0	1	78	-1.96	3	3	3	1
3								1	2	2	2	2	2	2	3	3	2	4	3	3	2	18	1	1	1	1	3	3	3	5	2	19	2	2	1	11	0	2	1	1	1	0	1	2	-5.6	1	1	1	1
3								1	1	1	1	2	2	2	2	2	2	2	2	3	2	13	1	3	3	4	4	4	4	3	3	28	2	3	3	18	0	3	3	2	64	0	1	65	-2.59	3	1	1	1
3								1	1	2	3	2	3	3	2	2	2	2	2	2	1	11	1	3	4	4	3	3	3	4	4	28	2	4	4	21	0	3	3	3	64	12	2	78	-1.57	3	3	3	2
3								3	1	2	2	3	2	1	3	2	1	2	1	2	2	9	1	4	4	3	2	3	2	4	3	25	3	4	3	18	0	1	3	3	64	0	1	65	-2.59	4	4	4	1
3								1	1	2	2	3	3	2	2	2	2	2	3	2	1	10	1	4	3	5	3	3	3	5	2	28	4	5	1	18	0	2	3	2	52	0	1	53	-3.16	3	6	1	1
3								1	2	2	2	2	4	3	3	3	1	3	3	3	1	14	1	4	4	4	4	4	4	5	2	31	2	2	2	12	0	2	2	1	64	0	1	65	-2.59	2	2	2	2
3								3	2	2	3	2	2	2	2	3	2	4	4	3	2	18	1	4	3	3	1	1	1	3	3	19	1	2	2	12	0	1	2	3	11	0	1	12	-5.12	3	1	1	1
3								1	1	1	2	3	3	2	2	2	2	2	2	2	1	9	1	4	3	3	3	3	3	4	4	27	3	3	3	20	0	3	3	3	58	43	2	103	-0.82	4	3	3	3
3								3	1	1	2	2	3	3	3	2	1	2	2	2	2	12	1	3	3	3	3	3	2	3	3	23	3	3	3	17	0	2	2	2	52	0	1	53	-3.16	4	4	3	3
3								1	1	2	2	3	3	2	2	2	1	2	2	3	1	9	1	3	3	4	2	4	4	4	3	27	3	3	4	20	0	3	3	2	64	0	1	65	-2.59	3	3	4	1
3								1	1	1	3	2	2	1	2	2	2	3	2	3	2	13	1	4	3	4	3	5	3	5	2	29	2	3	5	16	0	2	2	1	58	0	1	59	-2.87	3	3	3	3
3								1	2	3	2	2	3	3	2	1	1	2	2	2	1	9	1	4	4	3	4	4	4	4	3	30	3	3	3	16	0	2	2	2	71	7	2	80	-1.4	2	2	1	2
3								1	1	2	2	3	3	2	3	2	1	2	2	2	1	9	1	4	4	4	3	4	4	4	3	30	3	5	5	21	0	3	3	1	71	7	2	80	-1.4	5	2	1	2
3								1	1	2	2	3	3	3	3	1	1	2	2	2	2	10	1	3	3	3	3	3	3	3	3	24	3	3	3	19	0	3	3	2	86	0	1	87	-1.53	4	4	2	1
3								2	1	1	2	3	3	2	2	2	1	3	2	2	1	9	1	3	3	3	3	4	4	4	3	27	3	3	2	18	0	3	3	2	64	0	1	65	-2.59	5	3	2	1
3								3	1	1	2	3	3	3	2	2	1	2	2	2	1	9	1	3	3	5	4	3	3	4	4	29	3	3	3	21	0	3	4	3	71	0	1	72	-2.25	5	4	4	4
3								1	3	2	2	2	2	2	3	3	1	2	2	2	1	12	1	4	4	4	3	3	3	4	3	28	3	3	4	18	0	2	2	2	86	15	2	103	-0.41	5	5	2	2
3								3	1	2	2	2	2	2	2	2	2	2	2	2	1	11	1	3	3	3	3	3	3	4	3	25	3	3	3	19	0	3	3	3	71	13	2	86	-1.2	4	4	4	2
3								1	1	2	3	3	4	1	1	1	1	2	1	2	1	3	2	5	5	5	5	5	5	5	5	40	5	5	5	32	0	5	5	3	71	65	3	139	1.16	6	6	4	4
3								1	1	1	2	4	4	1	1	1	1	1	1	1	1	0	2	5	5	5	5	5	5	5	4	39	4	5	5	28	0	4	4	3	91	39	6	136	3.1	4	4	4	4
3								3	2	1	3	3	3	2	2	2	1	2	1	1	1	6	2	4	5	4	4	5	4	5	3	34	4	4	4	26	0	4	4	3	71	70	5	146	2.57	4	3	3	2
3								1	1	1	1	4	4	2	2	1	1	2	1	1	1	3	2	5	5	4	5	5	5	5	5	39	4	5	5	33	0	5	5	5	58	57	3	118	0.27	5	5	3	4
3								3	1	1	1	3	3	2	1	1	1	1	1	1	1	3	2	4	4	4	4	4	4	5	4	33	4	4	4	28	0	4	4	4	86	34	4	124	1.46	5	5	2	2
3								2	1	1	2	3	4	1	1	1	1	1	1	1	1	1	2	5	5	4	4	4	4	5	5	36	4	5	4	29	0	4	4	4	86	28	2	116	0.02	5	5	5	4
3								1	1	2	3	4	4	1	2	1	1	2	2	2	1	4	2	4	5	5	5	5	5	4	3	36	4	5	4	26	0	3	4	3	95	47	6	148	3.56	4	5	3	5
3								2	1	1	2	3	3	2	1	1	1	2	1	1	1	4	2	4	4	4	4	4	4	4	4	32	3	4	4	24	0	4	4	3	80	74	5	159	3.13	4	3	3	3
3								1	1	1	2	4	4	1	1	1	1	2	1	1	1	1	2	4	4	4	4	4	4	4	4	32	4	4	4	28	0	4	4	4	86	22	3	111	0.44	4	3	3	3
3								1	1	1	1	4	4	2	1	1	1	2	1	2	1	3	2	4	4	4	4	4	4	4	4	32	3	4	3	26	0	4	4	4	64	58	3	125	0.59	4	4	4	4
3								2	1	1	2	3	3	2	2	1	1	2	2	2	1	7	2	4	4	4	4	4	4	4	4	32	3	4	4	25	0	4	3	4	86	33	4	123	1.43	4	4	4	3
3								2	1	1	2	4	4	1	1	1	1	1	1	1	1	0	2	4	5	4	5	5	5	5	5	38	5	5	4	33	0	5	5	4	95	37	2	134	0.75	6	6	6	6
3								1	1	1	2	4	4	2	2	1	1	1	1	1	1	2	2	5	5	5	5	5	5	5	5	40	5	5	5	35	0	5	5	5	86	22	4	112	1.06	4	6	3	2
3								1	1	1	3	3	3	2	3	2	1	1	2	2	1	8	2	4	4	4	4	5	5	4	4	34	5	4	4	26	0	4	4	4	91	39	3	133	1.25	6	6	2	3
3								1	1	1	1	4	4	2	1	1	1	1	1	1	1	1	2	3	4	5	5	5	5	5	4	36	5	5	4	31	0	5	5	5	77	71	4	152	2.27	4	3	3	1
3								3	1	1	2	4	4	2	2	1	1	1	2	2	1	4	2	4	5	5	5	5	5	4	4	37	3	4	4	24	0	4	4	3	91	38	3	132	1.22	5	5	3	2
3								1	1	2	1	3	4	1	2	1	1	1	1	1	1	2	2	5	5	5	5	5	5	4	4	38	5	5	5	28	0	4	4	3	86	66	3	155	1.91	6	6	6	6
3								1	1	1	2	4	4	4	2	1	1	1	1	2	1	5	2	5	5	5	5	5	5	5	5	40	5	5	5	35	0	5	5	5	77	76	4	157	2.44	4	4	4	4
3								3	1	1	2	3	3	2	1	1	1	1	1	2	1	4	2	4	4	5	5	5	5	5	5	38	5	4	3	32	0	5	5	5	86	61	2	149	1.13	2	3	3	3
3								1	1	2	2	3	4	2	2	2	1	1	1	1	1	4	2	4	4	4	5	4	4	4	4	33	4	4	4	26	0	3	4	4	86	61	2	149	1.13	5	4	4	5
3								1	1	1	2	3	4	1	1	1	1	1	1	1	1	1	2	3	4	4	4	5	5	5	3	33	5	4	5	27	0	3	3	4	58	57	4	119	0.89	4	4	3	3
3								3	1	1	2	4	4	2	1	1	1	2	1	1	1	2	2	4	4	4	4	4	4	5	5	34	4	4	4	27	0	5	5	3	95	43	4	142	2.19	5	5	4	4
3								3	1	1	1	3	3	2	2	2	1	2	1	2	1	7	2	4	4	4	3	4	4	5	4	32	4	4	4	28	0	4	4	4	77	76	3	156	1.82	4	4	4	4
3								1	1	1	1	3	4	2	2	1	1	1	1	2	1	4	2	5	5	4	5	5	5	5	4	38	4	4	4	29	0	4	4	5	71	65	4	140	1.78	6	6	4	2
3								1	1	1	1	3	4	1	1	1	1	1	1	1	1	1	2	4	4	4	5	5	5	5	4	36	5	5	5	30	0	4	4	4	86	85	5	176	3.79	6	6	6	6
3								3	1	1	3	3	4	1	1	1	1	2	1	1	1	2	2	4	5	4	5	5	5	4	3	35	4	4	4	26	0	5	4	4	86	34	3	123	0.84	5	5	1	1
3								1	1	1	1	4	4	1	2	1	1	1	1	1	1	1	2	4	4	5	5	5	5	4	4	36	2	4	4	25	0	4	4	4	86	22	4	112	1.06	6	5	5	4
3								1	1	1	3	3	4	2	2	1	1	1	1	2	1	4	2	4	4	4	5	5	5	5	5	37	4	4	4	27	0	4	4	4	77	71	2	150	1.03	4	5	4	3
3								1	1	1	1	4	4	2	2	1	1	1	1	2	1	3	2	5	5	4	5	5	5	5	5	39	5	5	5	29	0	5	5	2	95	37	4	136	1.99	6	6	3	4
3								3	1	1	1	3	4	1	2	1	1	1	1	2	1	3	2	4	5	3	5	5	5	5	5	37	4	5	3	30	0	5	5	5	71	70	5	146	2.57	4	4	1	1
3								1	1	1	1	3	4	2	2	2	1	2	2	2	1	7	2	4	5	5	5	5	5	5	5	39	5	5	4	33	0	5	5	4	91	43	4	138	2	5	5	5	5
3								1	1	1	1	4	4	1	1	1	1	1	1	1	1	0	2	4	4	4	4	4	4	4	4	32	4	4	4	28	0	4	4	4	91	66	5	162	3.39	5	5	5	5
3								3	1	1	2	3	3	2	2	2	1	2	2	2	1	8	2	4	4	4	4	4	5	5	4	34	4	4	3	25	0	4	4	3	86	71	4	161	2.7	4	4	4	4
3								1	1	1	1	3	3	1	2	2	1	2	2	2	1	7	2	5	5	5	4	4	4	4	4	35	4	4	4	28	0	4	4	4	86	33	2	121	0.19	5	4	3	3
3								3	1	1	2	3	3	2	1	1	2	1	1	1	1	4	2	4	4	3	4	4	4	4	4	31	4	4	4	28	0	4	4	4	77	66	4	147	2.1	5	5	5	4
3								3	1	1	1	3	4	2	2	2	2	2	2	2	1	8	2	3	4	4	4	4	4	4	4	31	4	4	3	26	0	4	4	4	77	24	3	104	0.08	3	3	3	3
3								1	1	1	1	3	3	1	1	1	1	1	1	1	1	2	2	3	4	4	4	4	4	4	4	31	4	4	4	27	0	4	4	4	95	70	4	169	3.1	5	5	5	4
3								1	1	1	1	3	3	2	1	1	1	1	1	1	1	3	2	4	4	3	4	4	4	4	4	31	4	4	4	24	0	3	4	3	86	34	2	122	0.22	5	5	4	5
3								1	1	1	2	3	3	2	2	2	1	2	1	2	1	7	2	3	4	4	3	4	4	4	4	30	3	4	3	24	0	4	4	3	80	27	4	111	0.94	4	5	4	5
3								1	1	1	2	4	4	2	2	1	1	2	1	2	1	4	2	3	4	5	4	3	3	4	3	29	3	4	4	26	0	4	4	4	86	85	5	176	3.79	6	6	5	4
3								1	1	1	1	1	2	2	2	1	1	1	1	1	1	7	2	1	4	1	3	4	3	4	4	24	4	4	4	29	0	4	5	4	77	62	3	142	1.35	5	4	4	4
3								3	1	1	1	3	3	2	2	2	1	2	2	1	1	7	2	2	3	4	4	4	4	4	4	29	4	4	4	28	0	4	4	4	71	70	4	145	1.95	5	5	5	5
3								3	1	1	1	3	3	1	3	2	1	2	2	2	1	8	2	5	3	5	5	5	5	4	3	35	3	4	4	17	0	2	2	1	91	85	3	179	2.79	4	5	2	2
3								1	1	1	2	2	3	2	2	2	1	2	1	1	1	7	2	4	3	4	5	5	4	5	4	34	3	4	4	23	0	3	3	3	77	29	4	110	0.86	3	4	3	5
3								1	1	1	2	3	4	1	2	1	2	2	1	1	1	4	2	4	4	3	4	5	4	4	4	32	3	3	4	20	0	4	3	2	86	85	2	173	1.93	4	5	3	2
3								3	1	1	2	3	4	2	2	1	1	2	1	1	1	4	2	4	5	5	5	5	5	5	5	39	3	4	3	21	0	3	3	3	91	66	3	160	2.15	4	5	4	5
3								1	1	1	2	3	4	2	1	1	1	1	2	1	1	3	2	4	4	4	4	4	4	4	4	32	3	4	4	20	0	3	3	2	80	74	5	159	3.13	5	4	2	2
3								1	1	2	1	3	3	2	2	2	1	1	2	2	1	7	2	5	4	4	4	4	4	4	4	33	4	4	3	22	0	3	4	2	71	46	3	120	0.53	5	5	4	4
3								1	1	1	1	3	3	2	1	1	1	2	1	2	2	6	2	4	4	4	4	4	4	5	4	33	3	3	3	23	0	4	4	4	86	85	5	176	3.79	3	3	3	4
3								1	1	1	3	3	3	2	2	1	1	2	1	1	1	5	2	5	4	4	4	4	4	4	4	33	3	3	3	23	0	5	4	3	71	65	3	139	1.16	5	5	4	3
3								1	1	1	1	2	3	2	2	1	1	1	1	1	1	5	2	4	4	5	5	4	4	4	3	33	2	3	2	17	0	4	3	2	91	85	4	180	3.41	4	5	2	2
3								3	1	2	2	3	3	2	2	2	1	2	1	1	1	6	2	5	5	5	5	5	4	4	4	37	3	3	3	19	0	3	3	2	80	74	3	157	1.89	4	4	4	3
3								3	1	2	2	3	4	2	2	1	1	1	1	2	1	4	2	2	4	4	5	4	4	5	4	32	4	4	4	23	0	3	3	3	86	28	4	118	1.26	5	6	2	1
3								3	1	1	1	3	3	1	1	1	2	1	1	1	1	3	2	4	4	4	4	4	4	4	4	32	3	4	3	23	0	4	4	3	86	34	2	122	0.22	3	5	3	2
3								3	1	1	2	3	3	2	2	1	1	1	1	1	1	4	2	4	4	4	4	4	4	4	4	32	2	4	3	18	0	3	3	2	86	71	3	160	2.08	5	5	5	3
3								1	1	1	2	3	4	1	1	1	1	1	1	2	1	2	2	4	4	5	4	4	3	5	3	32	3	4	3	20	0	3	3	2	86	28	5	119	1.88	5	5	2	2
3								1	1	1	3	4	4	2	2	1	1	1	1	1	1	2	2	1	1	1	1	1	1	1	1	8	1	1	1	9	0	1	1	2	95	89	5	189	4.35	4	4	4	4
3								1	1	1	2	3	3	2	2	1	2	2	1	2	1	7	2	3	3	3	3	3	3	4	3	25	3	3	3	19	0	3	3	3	64	63	5	132	2	4	4	4	3
3								1	1	1	2	3	3	2	1	1	1	1	1	2	1	4	2	3	3	1	3	3	1	1	3	18	3	1	1	17	0	4	3	3	86	28	2	116	0.02	5	5	5	3
3								1	1	1	2	3	4	1	2	1	1	2	2	2	1	5	2	4	3	3	3	4	3	3	3	26	3	4	3	22	0	3	3	3	86	71	3	160	2.08	3	4	4	4
3								1	1	1	2	4	3	1	2	1	1	1	1	2	1	3	2	3	4	5	4	4	3	3	3	29	3	3	3	21	0	3	3	3	91	80	4	175	3.24	4	4	4	4
3								1	3	3	2	3	3	2	2	2	1	2	1	2	1	7	2	4	4	4	3	3	4	4	4	30	3	3	3	22	0	3	3	4	91	14	3	108	0.41	3	3	4	4
3								3	1	2	1	4	4	2	1	1	1	1	1	1	1	1	2	4	4	4	4	4	4	4	3	31	3	3	3	18	0	3	3	2	95	37	3	135	1.37	4	4	3	2
3								1	1	1	2	3	3	2	2	1	1	2	2	2	1	7	2	3	4	2	3	3	3	5	4	27	3	4	3	20	0	3	4	2	86	80	3	169	2.38	4	4	4	3
3								1	1	1	1	4	4	1	1	1	1	1	2	2	1	2	2	3	3	4	4	4	5	5	3	31	3	4	4	22	0	4	4	2	86	85	3	174	2.55	5	5	2	4
3								1	1	1	1	4	4	2	1	1	1	1	1	1	1	1	2	3	3	3	3	3	3	3	3	24	3	3	3	21	0	3	3	3	95	43	6	144	3.43	4	4	4	4
3								1	1	1	3	2	3	1	1	1	2	1	2	1	1	5	2	4	4	4	3	3	3	5	3	29	3	4	3	19	0	2	3	2	86	61	3	150	1.75	4	4	4	4
3								3	1	1	2	4	4	1	1	1	1	1	1	1	1	0	2	1	1	1	1	1	3	3	2	13	3	2	3	16	0	2	3	2	86	61	2	149	1.13	4	5	2	2
3								3	1	1	2	4	4	2	2	1	1	1	1	2	1	3	2	4	4	3	3	4	3	4	4	29	2	3	3	22	0	4	4	4	86	80	3	169	2.38	5	4	4	4
3								2	1	1	2	3	2	1	2	2	1	1	2	2	1	7	2	2	3	4	3	3	3	4	3	25	3	4	3	23	0	4	4	3	86	28	3	117	0.64	4	4	2	2
3								1	1	1	2	3	3	2	2	2	1	2	1	2	1	7	2	3	3	2	3	4	4	4	3	26	3	3	3	21	0	3	3	3	86	28	4	118	1.26	5	4	4	3
3								3	1	1	1	3	3	1	2	2	1	1	2	2	1	6	2	4	3	3	4	4	3	4	4	29	2	3	3	20	0	4	4	2	91	85	5	181	4.03	5	5	5	5
3								3	1	1	1	2	3	1	2	1	1	1	2	2	1	6	2	4	4	3	4	4	4	4	3	30	4	3	4	23	0	4	3	4	77	76	2	155	1.2	6	6	6	6
3								3	1	2	2	3	3	2	1	1	2	2	2	1	1	6	2	4	4	3	4	4	4	4	2	29	4	3	4	21	0	2	3	3	86	85	3	174	2.55	4	4	4	3
3								3	2	2	2	2	2	2	2	1	1	2	2	1	1	8	2	5	5	5	3	4	3	4	4	33	4	4	4	28	0	4	4	4	77	25	2	104	-0.51	4	3	3	4
3								3	1	1	1	3	3	2	2	1	1	1	1	2	1	5	2	4	5	4	5	5	5	4	5	37	5	5	5	35	0	5	5	5	95	0	1	96	-1.1	4	5	5	5
3								3	1	1	1	4	4	1	1	1	1	1	1	1	1	0	2	5	5	5	5	5	5	5	5	40	5	5	5	35	0	5	5	5	71	0	1	72	-2.25	6	6	6	6
3								1	1	1	1	4	4	1	1	1	1	1	1	1	1	0	2	4	4	4	4	4	4	4	4	32	3	4	4	24	0	4	4	3	91	0	1	92	-1.29	5	5	3	4
3								1	1	1	1	4	4	1	1	1	1	1	1	1	1	0	2	5	5	5	5	5	5	5	5	40	5	5	5	35	0	5	5	5	80	0	1	81	-1.82	6	6	6	6
3								1	1	1	1	3	3	2	2	1	1	2	1	2	1	6	2	4	4	4	4	4	4	4	4	32	4	4	4	26	0	4	4	3	71	18	3	92	-0.41	4	4	4	3
3								1	1	1	1	4	3	1	2	1	1	2	2	2	1	5	2	5	5	5	5	5	5	5	5	40	3	4	4	28	0	5	5	4	77	0	1	78	-1.96	6	6	6	6
3								1	1	1	1	3	3	2	2	1	1	1	1	2	1	5	2	4	4	4	4	4	4	4	4	32	4	4	4	28	0	4	4	4	77	13	2	92	-0.91	5	4	4	4
3								3	1	1	1	3	3	2	1	1	1	2	1	1	1	4	2	4	4	4	4	4	4	4	4	32	2	4	3	24	0	4	4	4	77	0	1	78	-1.96	5	5	5	5
3								3	1	1	3	3	4	2	2	1	1	2	1	1	1	4	2	4	4	5	4	5	4	4	4	34	4	4	5	27	0	4	4	3	86	22	2	110	-0.18	4	4	4	4
3								1	1	1	1	3	4	2	1	1	1	1	1	1	1	2	2	5	5	5	5	5	5	5	5	40	4	5	5	34	0	5	5	5	52	0	1	53	-3.16	6	6	6	4
3								1	1	1	1	4	4	2	1	1	1	2	1	1	1	2	2	4	5	5	5	5	5	5	5	39	5	5	4	32	0	5	5	4	53	0	1	54	-3.11	4	4	4	2
3								1	1	1	1	4	4	2	2	1	1	1	1	2	1	3	2	5	5	4	4	4	5	5	4	36	4	5	4	28	0	5	5	4	77	0	1	78	-1.96	5	5	5	5
3								1	1	1	2	3	3	2	2	2	1	2	2	2	1	8	2	3	4	5	4	4	5	5	4	34	3	3	4	24	0	4	4	4	52	51	2	105	-0.83	4	4	4	4
3								3	1	1	2	3	3	1	1	1	1	1	1	1	1	2	2	4	4	5	4	4	4	4	3	32	4	4	4	24	0	3	4	3	71	0	1	72	-2.25	5	4	4	4
3								1	1	1	1	4	4	2	2	2	1	1	2	1	1	4	2	4	4	4	5	5	5	4	4	35	4	4	4	28	0	4	4	4	71	19	3	93	-0.38	5	5	5	4
3								1	1	1	3	4	4	1	1	1	1	2	1	2	1	2	2	5	5	5	5	5	5	5	5	40	5	5	5	35	0	5	5	5	64	0	1	65	-2.59	2	5	2	3
3								1	1	1	1	4	4	2	2	1	1	2	1	1	1	3	2	5	5	5	5	5	5	5	5	40	3	4	4	25	0	4	4	3	71	0	1	72	-2.25	6	6	6	4
3								1	1	1	1	4	4	2	2	1	1	1	1	1	1	2	2	4	5	4	3	4	5	5	4	34	5	5	5	32	0	5	4	4	15	0	1	16	-4.93	2	5	5	5
3								3	1	1	1	4	4	1	1	1	1	1	1	1	1	0	2	4	4	4	4	4	4	4	4	32	4	4	4	28	0	4	4	4	71	0	1	72	-2.25	5	5	5	5
3								3	1	1	1	4	4	2	1	1	1	2	1	2	1	3	2	5	5	4	5	5	5	5	5	39	4	4	3	25	0	4	4	3	71	0	1	72	-2.25	5	5	5	4
3								3	2	3	1	3	3	1	1	1	1	2	1	2	1	4	2	4	4	4	4	4	4	4	4	32	5	4	4	26	0	4	4	3	86	0	1	87	-1.53	5	5	3	2
3								3	1	1	1	3	3	2	1	1	2	1	1	2	1	5	2	4	4	4	4	4	4	4	4	32	4	4	4	28	0	4	4	4	86	9	2	97	-0.61	3	3	3	3
3								1	1	1	2	3	3	1	2	1	1	1	2	2	1	5	2	3	5	4	4	5	5	5	4	35	3	5	4	26	0	4	4	5	64	49	2	115	-0.33	3	5	4	4
3								3	1	1	2	2	3	2	3	1	1	2	1	2	1	8	2	3	5	4	5	4	4	5	4	34	3	4	3	25	0	4	4	3	77	0	1	78	-1.96	3	4	4	4
3								1	1	1	1	3	3	2	2	2	1	1	2	2	1	7	2	4	5	5	5	5	5	4	5	38	5	5	5	34	0	4	5	5	91	14	2	107	-0.21	5	5	5	4
3								1	1	2	1	3	4	1	2	1	1	1	1	2	1	3	2	5	5	5	4	4	4	4	5	36	4	4	4	28	0	4	4	4	77	0	1	78	-1.96	4	5	4	4
3								2	1	1	2	3	3	1	1	1	1	1	1	1	1	2	2	4	3	4	5	4	3	5	4	32	4	4	4	25	0	4	4	3	6	0	1	7	-5.36	5	5	4	4
3								1	1	1	1	3	3	2	2	2	1	1	2	2	1	7	2	5	5	4	4	5	4	5	5	37	4	5	4	30	0	5	5	4	64	6	2	72	-1.77	5	4	3	6
3								1	1	1	1	4	3	2	1	1	1	2	1	1	1	3	2	5	5	4	4	4	4	4	4	34	4	4	4	28	0	4	4	4	86	15	2	103	-0.41	5	5	5	5
3								1	1	1	2	3	3	2	2	1	1	1	1	1	1	4	2	4	4	4	5	5	4	4	4	34	4	4	5	30	0	5	4	3	86	22	2	110	-0.18	6	4	1	3
3								1	1	1	1	3	3	1	1	1	1	1	1	1	1	2	2	4	4	5	4	4	4	4	4	33	3	4	5	24	0	3	4	3	80	16	2	98	-0.67	4	5	4	5
3								1	1	1	2	3	3	2	2	2	1	2	2	2	1	8	2	5	5	5	5	5	5	5	5	40	5	5	5	35	0	5	5	5	77	25	2	104	-0.51	3	5	5	5
3								1	1	2	2	3	2	2	2	1	1	1	1	2	1	6	2	5	5	5	3	5	4	5	5	37	5	5	5	25	0	3	2	3	86	0	1	87	-1.53	5	4	4	4
3								1	1	1	2	3	3	2	2	1	1	1	1	2	1	5	2	5	5	5	5	5	3	3	4	35	5	5	5	35	0	5	5	5	53	1	2	56	-2.46	5	5	5	5
3								3	1	1	2	4	4	1	2	2	2	1	1	2	1	4	2	5	5	5	5	5	5	5	5	40	5	3	3	24	0	5	5	2	86	0	1	87	-1.53	5	5	1	4
3								1	1	1	2	4	4	2	2	1	1	2	1	2	1	4	2	4	4	4	4	4	4	4	4	32	4	4	4	27	0	4	4	4	91	0	1	92	-1.29	5	5	4	4
3								1	1	1	1	3	3	1	1	1	1	2	1	2	1	4	2	3	4	4	4	4	4	4	4	31	4	4	4	27	0	4	4	4	64	12	3	79	-0.95	6	5	5	4
3								1	1	1	2	3	3	1	2	1	1	1	2	2	1	5	2	4	4	4	4	4	3	4	3	30	4	4	4	24	0	3	3	3	58	43	3	104	-0.2	5	5	4	5
3								3	1	2	2	2	3	2	2	1	1	2	2	1	1	7	2	4	3	3	4	4	5	4	3	30	4	3	3	25	0	4	4	3	86	0	1	87	-1.53	4	5	4	4
3								1	1	1	1	3	3	1	2	1	1	1	1	1	1	3	2	5	4	3	3	4	4	4	4	31	4	4	3	25	0	4	4	3	71	0	1	72	-2.25	5	5	3	3
3								1	1	1	1	4	4	2	4	1	2	1	1	2	1	6	2	4	4	3	5	5	5	4	3	33	5	3	5	22	0	3	3	2	24	23	3	50	-2.49	5	5	4	4
3								1	1	1	1	4	3	2	2	2	1	2	2	2	2	8	2	4	4	4	4	5	5	5	4	35	3	4	2	17	0	2	3	1	52	0	1	53	-3.16	6	6	6	6
3								3	1	2	1	4	3	2	2	1	1	2	1	2	1	5	2	5	5	4	4	4	4	5	4	35	4	4	4	23	0	3	4	2	86	0	1	87	-1.53	5	5	5	4
3								1	1	1	1	3	4	2	1	1	1	1	1	1	1	2	2	5	4	4	5	5	5	5	4	37	3	4	4	23	0	3	3	3	53	1	2	56	-2.46	5	5	4	3
3								3	1	1	1	4	4	1	1	1	1	1	1	1	1	0	2	5	5	5	5	5	5	5	3	38	2	5	5	21	0	3	3	2	77	0	1	78	-1.96	6	6	6	6
3								2	1	1	1	3	4	1	1	1	1	1	1	1	1	1	2	4	4	4	5	5	4	4	4	34	3	4	3	22	0	3	3	3	77	0	1	78	-1.96	4	4	4	4
3								1	1	1	1	3	3	2	2	1	1	1	1	1	1	4	2	3	3	3	3	3	3	3	3	24	3	3	3	21	0	3	3	3	64	11	3	78	-0.98	4	4	4	4
3								3	1	2	2	4	4	2	1	1	1	1	1	1	1	1	2	4	4	3	3	3	4	4	3	28	4	3	4	23	0	3	3	3	71	7	2	80	-1.4	4	4	4	4
3								1	2	2	1	2	3	2	1	1	1	2	2	3	1	8	2	3	4	4	4	4	4	4	3	30	3	3	3	21	0	3	3	3	86	9	2	97	-0.61	5	5	5	5
3								1	1	1	1	2	3	2	2	1	1	2	2	2	1	8	2	3	4	3	4	4	4	4	4	30	4	3	4	23	0	3	3	3	86	22	2	110	-0.18	4	4	4	3
3								1	1	1	1	4	4	2	1	1	1	2	1	1	1	2	2	3	3	4	4	4	4	4	4	30	3	4	4	23	0	3	4	3	64	11	3	78	-0.98	5	5	4	3
3								1	1	2	1	3	4	1	1	1	1	2	1	1	1	2	2	2	3	4	2	3	5	4	3	26	3	5	4	23	0	4	3	2	71	19	2	92	-1	5	4	1	1
3								1	2	3	3	3	2	2	2	1	1	2	2	2	1	8	2	3	3	3	2	3	4	3	2	23	3	3	4	17	0	2	3	1	52	51	2	105	-0.83	2	2	1	1
3								1	1	1	1	3	3	2	2	1	1	1	1	2	1	5	2	4	4	3	3	4	4	4	4	30	4	4	4	23	0	3	4	3	6	0	1	7	-5.36	5	5	5	4
3								3	1	2	3	3	4	2	1	1	1	1	1	1	1	2	2	4	5	4	4	4	5	5	4	35	4	4	4	28	0	4	4	4	53	52	4	109	0.48	4	4	4	4
3								1	1	1	2	3	3	1	1	1	1	1	1	1	1	2	2	5	4	4	4	4	5	5	5	36	3	3	4	24	0	4	4	3	86	85	5	176	3.79	3	2	3	2
3								1	1	1	1	3	3	2	2	2	1	2	2	2	1	8	2	4	4	4	4	4	4	4	4	32	4	4	4	28	0	4	4	4	71	70	2	143	0.71	1	1	1	1
3								1	1	2	2	3	3	2	2	2	1	2	1	2	1	7	2	5	4	4	4	5	4	5	4	35	4	4	4	27	0	4	4	4	91	27	2	120	0.23	4	3	3	3
3								3	2	2	2	2	3	1	2	1	1	2	2	2	1	7	2	4	4	5	4	4	4	4	4	33	4	5	5	28	0	3	3	4	91	85	2	178	2.17	4	4	3	3
3								1	1	1	1	4	4	4	1	1	1	1	1	1	1	3	2	5	5	5	5	5	5	5	5	40	1	5	5	30	0	5	5	4	86	85	7	178	5.02	2	3	2	1
3								1	1	1	2	3	4	1	1	1	1	1	1	1	1	1	2	4	5	5	5	5	4	5	5	38	3	4	3	26	0	5	5	4	71	70	3	144	1.33	5	4	4	1
3								1	1	1	2	3	3	2	2	2	1	2	1	1	1	6	2	5	4	5	4	4	4	5	5	36	5	4	4	32	0	4	5	5	86	33	4	123	1.43	4	4	4	4
3								3	1	2	1	3	4	1	1	1	1	2	1	1	1	2	2	4	5	4	5	5	5	5	5	38	5	5	5	35	0	5	5	5	86	80	6	172	4.24	4	5	4	1
3								1	1	1	3	3	4	3	1	1	1	1	1	3	1	5	2	3	4	5	5	5	5	5	5	37	5	5	4	30	0	5	5	3	86	85	3	174	2.55	4	5	4	1
3								1	1	1	1	4	4	1	1	1	1	1	1	1	1	0	2	4	5	3	4	4	4	5	4	33	4	4	4	26	0	4	4	3	86	71	6	163	3.94	4	4	4	3
3								1	1	1	3	4	4	3	2	1	1	2	2	2	1	6	2	4	4	3	4	4	4	4	4	31	4	4	4	25	0	3	4	3	71	47	4	122	1.18	5	4	4	4
3								3	1	1	2	3	3	2	2	1	1	1	2	2	1	6	2	3	3	4	4	4	4	5	4	31	5	5	4	33	0	5	5	4	86	85	4	175	3.17	4	4	4	4
3								1	1	1	1	4	4	2	2	2	1	1	1	1	1	3	2	4	5	3	3	4	4	4	4	31	4	5	4	28	0	4	4	3	91	66	3	160	2.15	4	4	4	4
3								1	1	1	1	3	3	1	1	1	1	1	1	1	1	2	2	3	4	4	4	4	4	4	4	31	3	4	4	24	0	4	4	3	71	70	3	144	1.33	5	5	5	2
3								1	1	2	1	2	4	2	2	1	1	1	2	2	1	6	2	4	3	4	3	5	4	4	4	31	4	4	4	27	0	4	4	4	86	61	2	149	1.13	3	4	4	2
3								1	1	1	2	4	4	4	1	1	2	2	2	1	1	6	2	4	4	3	4	4	4	4	4	31	5	4	4	33	0	5	5	5	86	71	4	161	2.7	4	5	2	1
3								1	1	1	3	3	3	2	2	1	1	2	2	2	1	7	2	3	4	4	4	4	4	4	4	31	4	4	4	27	0	4	4	4	86	80	2	168	1.76	3	3	2	1
3								1	1	1	1	4	4	2	1	1	1	1	1	2	1	2	2	3	5	5	5	5	4	3	3	33	2	4	3	18	0	2	3	2	86	80	6	172	4.24	4	4	3	4
3								1	1	1	2	3	4	3	2	1	2	2	1	1	1	6	2	4	4	4	5	5	5	4	4	35	3	5	5	23	0	3	3	3	71	65	3	139	1.16	2	1	1	1
3								1	2	2	3	3	3	2	3	2	1	1	2	2	1	8	2	4	4	4	4	4	4	4	4	32	3	4	3	18	0	3	3	1	91	39	2	132	0.63	2	4	1	4
3								1	1	2	1	3	4	1	2	1	1	1	1	2	1	3	2	4	4	4	4	4	4	4	4	32	3	4	3	20	0	3	3	2	91	90	3	184	2.96	3	1	1	1
3								3	1	1	1	3	3	1	2	2	1	2	2	2	1	7	2	4	4	4	4	4	4	4	4	32	2	4	3	22	0	4	4	3	77	62	3	142	1.35	4	3	2	1
3								1	1	1	1	3	3	1	2	1	2	2	1	1	1	5	2	4	4	4	4	4	4	4	4	32	2	4	4	21	0	3	4	2	86	80	5	171	3.62	4	3	3	3
3								1	1	1	2	4	3	2	2	1	1	2	2	2	1	6	2	4	4	3	4	4	4	5	4	32	3	4	2	18	0	3	3	2	86	61	6	153	3.6	5	3	2	2
3								1	1	1	3	2	3	2	1	1	1	2	1	1	1	5	2	3	3	2	3	3	5	4	3	26	3	3	1	19	0	3	4	3	58	57	3	118	0.27	2	2	1	1
3								3	1	1	2	3	3	2	1	1	1	1	1	2	1	4	2	4	4	4	4	4	3	3	2	28	3	4	3	18	0	2	2	2	71	70	3	144	1.33	4	4	4	4
3								1	1	1	2	3	3	2	2	1	1	1	2	2	1	6	2	4	3	4	3	3	3	4	4	28	3	3	3	23	0	3	4	3	71	56	2	129	0.24	4	4	4	4
3								1	1	1	1	4	4	2	2	1	1	1	2	2	1	4	2	4	4	4	4	4	4	4	3	31	3	4	4	22	0	3	3	3	80	74	3	157	1.89	5	4	3	1
3								1	1	1	2	3	3	2	2	1	1	2	2	3	1	8	2	4	3	4	4	4	3	3	2	27	3	3	3	19	0	3	3	2	86	80	2	168	1.76	3	4	4	4
3								2	1	1	2	3	3	2	2	1	1	2	2	2	1	7	2	4	4	4	3	3	3	4	3	28	3	4	3	19	0	3	3	2	86	85	4	175	3.17	4	4	3	3
3								3	1	1	2	3	4	1	2	1	1	1	1	1	1	2	2	4	4	3	4	4	4	4	3	30	2	3	3	19	0	3	3	3	64	63	2	129	0.14	4	4	4	1
3								1	1	1	2	3	3	2	2	1	1	2	2	2	1	7	2	3	4	4	4	4	3	4	4	30	3	3	3	22	0	4	4	3	71	65	4	140	1.78	3	1	1	1
3								3	1	1	2	3	4	2	2	2	2	1	1	1	1	5	2	3	3	3	3	3	4	4	3	26	3	3	3	20	0	3	3	3	86	75	7	168	4.69	3	3	3	4
3								1	1	2	2	3	3	2	2	1	2	2	2	2	1	8	2	3	4	3	3	2	3	5	4	27	3	3	2	20	0	3	3	3	86	85	7	178	5.02	3	4	4	2
3								1	1	1	2	3	3	2	2	2	1	1	2	2	1	7	2	3	3	4	4	4	3	3	2	26	3	3	3	21	0	3	3	3	86	15	3	104	0.21	1	1	1	1
3								1	1	2	2	3	3	2	1	1	1	2	1	3	1	6	2	3	3	4	3	3	3	4	3	26	3	3	3	21	0	3	3	3	71	60	2	133	0.38	4	4	3	3
3								3	1	1	2	3	3	3	2	1	1	2	1	2	1	7	2	4	3	2	3	4	4	4	3	27	3	4	3	21	0	3	3	3	64	63	2	129	0.14	5	5	3	5
3								3	1	2	2	2	2	1	1	1	1	1	1	2	1	5	2	3	4	4	3	4	3	3	3	27	3	3	3	21	0	3	3	3	71	70	3	144	1.33	4	4	4	4
3								3	1	1	2	1	1	1	1	1	1	2	1	1	1	7	2	3	3	4	4	4	4	5	4	31	3	4	3	22	0	4	4	2	86	85	3	174	2.55	4	2	4	2
3								3	1	1	2	4	4	1	1	1	2	1	1	2	1	2	2	4	4	3	3	3	3	3	3	26	3	3	4	22	0	3	3	4	95	75	13	183	8.83	4	4	3	3
3								1	1	1	1	2	4	2	1	1	1	2	1	2	1	5	2	3	3	4	1	1	1	5	3	21	2	3	2	20	0	5	5	2	71	60	3	134	0.99	4	1	1	1
3								3	1	1	2	2	3	1	2	1	1	1	1	1	1	4	2	3	4	4	4	4	4	4	3	30	3	3	4	21	0	3	3	3	86	33	2	121	0.19	5	4	4	3
3								2	1	1	1	3	3	1	1	1	1	2	1	2	1	4	2	4	4	4	4	4	4	4	4	32	4	4	4	28	0	4	4	4	71	13	2	86	-1.2	5	5	5	4
3								1	1	1	1	3	3	2	2	2	2	2	1	2	1	8	2	4	4	4	4	4	4	4	5	33	4	4	4	27	0	4	4	4	58	5	2	65	-2.09	4	3	3	2
3								1	1	1	1	4	4	2	1	1	1	2	1	2	1	3	2	4	4	5	4	4	4	5	5	35	4	4	3	25	0	4	4	4	53	0	1	54	-3.11	4	4	3	3
3								1	1	1	2	4	4	2	2	1	1	1	2	2	1	4	2	5	5	5	5	5	5	5	5	40	5	5	5	35	0	5	5	5	15	0	1	16	-4.93	2	2	2	2
3								3	1	1	2	2	3	2	2	1	1	2	1	2	1	7	2	4	4	4	4	4	4	4	4	32	4	4	4	28	0	4	4	4	52	0	1	53	-3.16	4	4	4	4
3								3	1	1	2	3	3	3	1	1	1	1	1	2	1	5	2	4	4	4	4	4	4	4	4	32	4	4	4	25	0	4	4	3	77	6	2	85	-1.14	3	1	1	1
3								1	2	3	2	3	3	2	2	2	1	2	2	2	1	8	2	4	4	4	5	5	5	4	4	35	4	4	3	28	0	4	5	4	15	9	2	26	-4.01	5	5	3	2
3								1	1	1	2	1	1	2	1	1	1	1	1	1	1	7	2	5	4	4	5	4	4	4	5	35	4	4	4	30	0	4	5	4	86	15	2	103	-0.41	2	4	1	1
3								1	1	1	1	3	3	3	1	1	1	1	1	2	1	5	2	3	4	4	4	4	4	4	4	31	4	4	3	26	0	3	4	4	15	0	1	16	-4.93	4	2	2	1
3								1	1	1	2	2	3	2	2	1	2	2	1	2	1	8	2	3	3	3	3	3	3	4	4	26	4	4	4	26	0	4	4	3	15	0	1	16	-4.93	4	4	1	2
3								1	1	1	1	4	4	2	2	2	1	2	1	2	1	5	2	3	4	3	5	5	3	4	4	31	4	4	4	24	0	4	4	2	86	0	1	87	-1.53	4	5	2	2
3								1	1	1	1	2	4	1	2	2	1	2	2	2	1	7	2	4	4	4	4	4	4	4	3	31	4	4	3	24	0	3	4	3	71	13	3	87	-0.58	5	4	4	3
3								1	1	1	1	3	3	2	2	2	1	2	2	1	1	7	2	3	3	4	3	4	4	4	4	29	4	4	4	26	0	4	4	4	64	39	2	105	-0.66	5	5	5	4
3								3	1	1	2	3	3	2	2	2	1	1	2	2	1	7	2	4	5	5	5	5	5	4	3	36	4	5	4	22	0	3	2	2	71	0	1	72	-2.25	4	5	2	1
3								1	1	2	1	4	3	1	1	1	1	1	1	1	1	1	2	3	5	5	4	4	5	4	3	33	3	4	4	23	0	4	3	3	58	6	2	66	-2.05	4	4	4	1
3								1	1	2	2	3	4	2	2	1	1	1	1	1	1	3	2	3	4	4	4	4	4	5	4	32	3	3	3	18	0	3	3	2	53	38	3	94	-0.6	5	5	1	4
3								1	1	2	2	2	4	2	2	1	1	2	2	2	1	7	2	5	4	4	4	4	4	4	4	33	2	4	1	15	0	3	3	1	64	49	2	115	-0.33	4	3	1	1
3								3	1	1	2	2	4	1	2	2	1	2	1	2	1	6	2	3	3	3	3	3	3	3	3	24	3	3	3	20	0	3	3	2	53	0	1	54	-3.11	4	4	4	4
3								1	3	2	3	2	3	1	2	1	1	1	2	2	1	6	2	4	3	4	4	4	4	5	3	31	3	3	3	19	0	3	3	2	11	0	1	12	-5.12	3	5	2	1
3								3	1	1	2	2	3	1	1	1	1	2	1	2	1	5	2	3	4	3	4	4	4	4	4	30	2	4	3	19	0	3	3	2	1	0	1	2	-5.6	4	5	3	2
3								2	1	2	2	3	3	2	2	1	1	2	1	2	1	6	2	4	3	3	3	3	4	4	3	27	3	3	3	17	0	2	2	2	86	9	2	97	-0.61	5	5	4	1
3								1	1	1	2	3	3	2	2	2	1	2	1	2	1	7	2	4	3	3	4	4	4	4	4	30	1	3	3	20	0	4	4	3	1	0	1	2	-5.6	3	3	3	3
3								1	1	1	1	3	3	1	2	2	1	1	2	1	1	5	2	4	3	3	3	3	3	4	2	25	3	3	3	19	0	3	3	2	52	0	1	53	-3.16	4	3	3	1
3								1	1	1	2	2	2	2	2	1	1	2	1	1	1	7	2	4	3	3	2	2	4	4	3	25	3	3	3	21	0	3	3	3	64	0	1	65	-2.59	4	4	4	4
3								3	1	2	2	2	4	1	2	1	1	1	1	1	1	3	2	4	4	4	3	3	4	4	3	29	3	3	3	19	0	3	3	2	52	0	1	53	-3.16	4	4	3	3
3								1	1	2	2	2	4	2	2	1	2	2	2	2	1	8	2	3	3	3	3	3	3	5	3	26	4	4	4	23	0	3	4	3	64	0	1	65	-2.59	3	4	1	1
3								3	1	1	2	3	3	1	1	1	1	2	1	2	1	4	2	4	3	3	3	3	3	3	3	25	3	3	3	20	0	3	3	3	53	0	1	54	-3.11	4	4	4	4
3								1	1	1	2	4	4	1	2	1	1	1	1	1	1	1	2	3	4	4	4	4	4	4	4	31	3	5	3	23	0	4	4	3	52	0	1	53	-3.16	1	2	1	1
3								1	1	1	2	3	3	2	2	1	1	1	1	1	1	4	2	4	4	5	4	4	3	4	3	31	3	4	3	19	0	2	3	2	86	22	2	110	-0.18	4	3	2	1
3								1	1	2	2	2	3	4	1	1	1	1	1	1	2	7	2	2	4	3	1	2	3	5	3	23	3	4	1	18	0	2	2	4	1	0	1	2	-5.6	2	2	2	2
3								1	1	1	1	3	4	1	2	2	1	1	1	1	1	3	2	4	4	3	4	4	4	4	4	31	2	4	4	22	0	4	3	3	71	13	3	87	-0.58	5	4	2	2
3								2	1	1	2	2	2	1	1	1	1	1	1	1	1	4	2	3	3	3	3	3	4	4	4	27	2	2	2	18	0	4	4	2	15	0	1	16	-4.93	4	4	4	4
3								1	1	1	2	3	3	1	1	1	1	2	1	2	1	4	2	4	4	4	4	4	4	3	3	30	3	3	3	19	0	3	3	2	52	0	1	53	-3.16	4	4	4	4
3								1	1	1	1	4	4	2	1	1	1	1	1	1	1	1	2	2	4	2	2	2	2	4	3	21	2	2	3	15	0	2	2	2	53	52	2	107	-0.75	2	2	1	1
3								1	1	1	3	2	3	2	2	2	2	1	1	2	1	8	2	3	3	3	3	3	4	4	4	27	3	4	3	21	0	3	3	3	15	0	1	16	-4.93	4	4	4	4
3								3	1	1	2	2	3	1	1	1	1	1	1	1	1	3	2	3	4	3	4	4	4	3	3	28	2	4	3	20	0	4	3	2	15	14	2	31	-3.84	2	5	1	1
3								2	1	2	2	2	3	2	2	1	1	1	1	1	1	5	2	4	3	4	3	3	3	4	4	28	2	4	2	20	0	4	4	2	20	0	1	21	-4.69	4	3	2	2
3								1	1	2	2	3	3	2	2	1	1	1	1	1	1	4	2	4	4	3	4	4	4	4	3	30	2	3	3	16	0	2	2	2	1	0	1	2	-5.6	3	4	4	4
3								1	1	1	2	3	3	2	3	1	1	2	1	2	1	7	2	3	3	2	4	4	3	4	3	26	3	4	3	21	0	3	2	3	71	7	2	80	-1.4	2	3	1	1
3								1	1	2	2	3	4	2	1	1	2	1	1	1	1	3	2	2	3	4	3	4	4	4	3	27	2	3	4	22	0	4	3	3	64	44	2	110	-0.49	2	4	4	2
3								1	1	1	2	3	3	2	1	1	2	1	1	1	1	4	2	3	4	5	3	4	5	4	3	31	4	4	4	23	0	3	3	3	52	0	1	53	-3.16	3	3	1	1
3								1	1	1	2	4	4	2	2	2	2	2	1	2	1	6	2	3	4	3	4	4	4	4	4	30	3	4	4	23	0	4	4	2	64	11	2	77	-1.6	5	5	2	2
3								1	1	1	1	4	4	1	1	1	1	1	1	1	1	0	2	2	3	3	3	3	3	3	3	23	3	3	3	21	0	3	3	3	1	0	1	2	-5.6	4	4	4	4
3								2	1	1	1	3	3	2	2	1	1	2	1	1	1	5	2	3	4	5	4	4	4	4	3	31	3	3	2	20	0	3	3	3	71	0	1	72	-2.25	3	4	2	1
3								1	1	1	2	3	3	2	2	1	1	2	2	2	1	7	2	4	4	4	4	4	4	4	3	31	3	3	3	21	0	3	3	3	53	0	1	54	-3.11	4	5	4	2
3								1	1	2	2	2	2	2	1	1	2	1	1	2	1	7	2	2	2	4	2	2	2	4	3	21	3	3	3	17	0	2	2	2	71	0	1	72	-2.25	3	3	2	1
3								3	1	2	1	3	2	2	1	1	1	1	2	2	1	6	2	4	4	3	3	3	3	4	3	27	2	2	4	14	0	2	2	1	91	0	1	92	-1.29	5	5	1	3
3								3	1	1	2	3	3	1	2	1	1	2	1	1	1	4	2	3	3	1	3	3	4	3	3	23	2	2	3	13	0	1	3	1	64	12	3	79	-0.95	2	2	1	1
3								3	2	2	3	3	4	2	1	1	1	2	1	1	1	3	2	3	3	4	3	4	4	5	4	30	3	3	3	20	0	3	3	3	15	0	1	16	-4.93	4	4	3	2
3								3	1	1	2	2	3	2	2	2	1	1	2	2	1	8	2	2	3	4	2	4	3	3	3	24	3	3	3	20	0	3	3	3	64	39	3	106	-0.04	4	3	3	2
3								1	1	1	2	3	3	2	2	1	1	2	1	2	1	6	2	2	2	3	4	4	4	4	2	25	4	4	4	23	0	4	4	2	86	0	1	87	-1.53	5	4	1	2
3								1	1	1	2	4	4	2	2	2	1	3	1	1	1	5	2	4	4	4	3	4	4	4	3	30	3	3	3	19	0	3	4	2	58	0	1	59	-2.87	3	3	3	3
3								3	1	1	3	3	3	2	2	2	1	2	1	2	1	7	2	3	3	3	4	4	4	5	4	30	3	3	3	23	0	4	4	4	64	39	3	106	-0.04	4	4	4	1
3								3	1	1	1	3	4	1	2	1	1	1	1	2	1	3	2	3	4	3	4	4	4	3	4	29	4	3	4	20	0	1	1	3	53	42	2	97	-1.09	4	4	4	4
3								3	1	1	1	4	4	2	2	1	1	1	1	1	1	2	2	1	1	1	1	1	1	1	1	8	1	1	1	7	0	1	1	1	64	0	1	65	-2.59	5	5	1	1
3								3	1	1	1	4	4	2	2	1	1	1	1	2	1	3	2	4	3	4	4	4	4	4	2	29	3	4	3	19	0	2	3	2	91	14	2	107	-0.21	5	5	1	1
[truncated: 9 more columns]
